# Supplementary material for: The Effects of Soil Improving Cropping Systems (SICS) on Soil Erosion and Soil Organic Carbon Stocks across Europe: A Simulation Study
Source: MDPI journal article supplement (doi:10.3390/land11060943), 2022-06-19
Supplement: s1 [file s1]

**Input data for the PESERA model as used in this study:**

[illegible]

| Crop                          | Region        | Y1 |   |     |     |      |      |      |       |     |     | Y2  |     |     |      |      |      |     |     |     |     |
|-------------------------------|---------------|----|---|-----|-----|------|------|------|-------|-----|-----|-----|-----|-----|------|------|------|-----|-----|-----|-----|
|                               |               | 1  | 2 | 3   | 4   | 5    | 6    | 7    | 8     | 9   | 10  | 11  | 12  | 1   | 2    | 3    | 4    | 5   | 6   | 7   | 8   |
| Spring cereal                 | Continental   |    |   |     |     | 0.3  | 0.6  | 1.15 | 1.15  | 0.3 |     |     |     |     |      |      |      |     |     |     |     |
|                               | Mediterranean |    |   |     | 0.3 | 0.6  | 1.15 | 1.15 | 0.3   |     |     |     |     |     |      |      |      |     |     |     |     |
|                               | Oceanic       |    |   |     | 0.3 | 0.6  | 1.15 | 1.15 | 0.3   |     |     |     |     |     |      |      |      |     |     |     |     |
|                               | Subartic      |    |   |     |     | 0.3  | 0.6  | 1.15 | 1.15  | 0.3 |     |     |     |     |      |      |      |     |     |     |     |
| Winter cereal                 | Continental   |    |   |     |     |      |      |      |       |     | 0.3 | 0.3 | 0.4 | 0.6 | 0.8  | 1    | 1.15 | 0.6 | 0.4 | 0.3 |     |
|                               | Mediterranean |    |   |     |     |      |      |      |       |     |     | 0.3 | 0.5 | 0.7 | 0.9  | 1    | 1.15 | 0.5 | 0.3 |     |     |
|                               | Oceanic       |    |   |     |     |      |      |      |       |     | 0.3 | 0.3 | 0.4 | 0.6 | 0.8  | 1    | 1.15 | 0.6 | 0.4 | 0.3 |     |
|                               | Subartic      |    |   |     |     |      |      |      |       |     | 0.3 | 0.3 | 0.3 | 0.3 | 0.4  | 0.6  | 0.8  | 1.1 | 0.6 | 0.3 | 0.3 |
| Maize                         | Continental   |    |   |     | 0.4 | 0.7  | 0.95 | 1.15 | 1.15  | 0.7 | 0.2 |     |     |     |      |      |      |     |     |     |     |
|                               | Mediterranean |    |   |     | 0.4 | 0.8  | 1.15 | 1.15 | 0.7   |     |     |     |     |     |      |      |      |     |     |     |     |
|                               | Oceanic       |    |   |     | 0.4 | 0.7  | 0.95 | 1.15 | 1.15  | 0.7 | 0.2 |     |     |     |      |      |      |     |     |     |     |
|                               | Subartic      |    |   |     |     |      |      |      |       |     |     |     |     |     |      |      |      |     |     |     |     |
| Pulses                        | Continental   |    |   | 0.4 | 0.8 | 1.15 | 0.35 |      |       |     |     |     |     |     |      |      |      |     |     |     |     |
|                               | Mediterranean |    |   |     |     |      |      |      |       |     |     |     | 0.4 | 0.8 | 1.15 | 0.35 |      |     |     |     |     |
|                               | Oceanic       |    |   | 0.4 | 0.8 | 1.15 | 0.35 |      |       |     |     |     |     |     |      |      |      |     |     |     |     |
|                               | Subartic      |    |   |     |     |      |      |      |       |     |     |     |     |     |      |      |      |     |     |     |     |
| Sugarbeet                     | Continental   |    |   |     | 0.4 | 0.6  | 0.9  | 1.2  | 1.2   | 0.7 | 0.5 |     |     |     |      |      |      |     |     |     |     |
|                               | Mediterranean |    |   | 0.4 | 0.5 | 0.7  | 0.95 | 1.2  | 1.2   | 0.7 | 0.5 |     |     |     |      |      |      |     |     |     |     |
|                               | Oceanic       |    |   |     | 0.4 | 0.6  | 0.9  | 1.2  | 1.2   | 0.7 | 0.5 |     |     |     |      |      |      |     |     |     |     |
|                               | Subartic      |    |   |     |     |      |      |      |       |     |     |     |     |     |      |      |      |     |     |     |     |
| Potato                        | Continental   |    |   |     | 0.5 | 0.8  | 1.15 | 1.15 | 0.5   | 0.3 | 0.1 |     |     |     |      |      |      |     |     |     |     |
|                               | Mediterranean |    |   |     | 0.5 | 0.8  | 1.15 | 1.15 | 0.5   | 0.3 |     |     |     |     |      |      |      |     |     |     |     |
|                               | Oceanic       |    |   |     | 0.5 | 0.8  | 1.15 | 1.15 | 0.5   | 0.3 | 0.1 |     |     |     |      |      |      |     |     |     |     |
|                               | Subartic      |    |   |     | 0.5 | 0.8  | 1.15 | 1.15 | 0.5   | 0.3 |     |     |     |     |      |      |      |     |     |     |     |
| Oilseed                       | Continental   |    |   |     |     |      |      |      | 0.7   | 1   |     | 1   | 1   | 1   | 1    | 1    | 1.15 | 0.8 | 0.5 |     |     |
|                               | Mediterranean |    |   |     |     |      |      |      |       |     |     | 0.7 | 1   | 1   | 1    | 1    | 1.15 | 0.8 | 0.5 |     |     |
|                               | Oceanic       |    |   |     |     |      |      |      | 0.7   | 1   | 1   | 1   | 1   | 1   | 1    | 1    | 1.15 | 0.8 | 0.5 | 0.5 |     |
|                               | Subartic      |    |   |     |     |      |      |      |       |     | 0.7 | 1   | 1   | 1   | 1    | 1    | 1.15 | 0.8 | 0.5 |     |     |
| Veg & Flowers<br>(sunflowers) | Continental   |    |   |     |     | 0.45 | 0.9  | 1    | 0.7   |     |     |     |     |     |      |      |      |     |     |     |     |
|                               | Mediterranean |    |   |     | 0.5 | 0.8  | 1    | 1    | 0.7</ |     |     |     |     |     |      |      |      |     |     |     |     |

*Table S3: Rooting depth, initial surface storage and reduction of surface storage per land use and crop type as used in SoilCare PESERA modelling*

| Land use / crop      | Rooting depth (mm) | Initial surface storage (mm) | Reduction of surface roughness (%) |
|----------------------|--------------------|------------------------------|------------------------------------|
| Artificial           | 10                 | 0                            | 0                                  |
| Bare land            | 10                 | 5                            | 0                                  |
| Grassland            | 500                | 5                            | 0                                  |
| Shrubs               | 600                | 5                            | 0                                  |
| Vineyards            | 800                | 5                            | 0                                  |
| Fruit trees          | 800                | 5                            | 0                                  |
| Olive groves         | 800                | 5                            | 0                                  |
| Broadleaf Forest     | 1000               | 5                            | 0                                  |
| Coniferous Forest    | 1000               | 5                            | 0                                  |
| Mixed Forest         | 1000               | 5                            | 0                                  |
| Water                | 10                 | 0                            | 0                                  |
|                      |                    |                              |                                    |
| Winter cereals       | 400                | 10                           | 50                                 |
| Spring cereals       | 400                | 10                           | 50                                 |
| Consumption maize    | 600                | 10                           | 50                                 |
| Fodder maize         | 600                | 10                           | 50                                 |
| Pulses               | 400                | 10                           | 50                                 |
| Rice                 | 500                | 10                           | 50                                 |
| Sugarbeet            | 500                | 10                           | 50                                 |
| Potato               | 500                | 10                           | 50                                 |
| Oilseed              | 400                | 10                           | 50                                 |
| Vegetables & Flowers | 600                | 10                           | 50                                 |
| Forage               | 400                | 10                           | 50                                 |
| Fallow               | 10                 | 10                           | 50                                 |

### ***Erodibility calculation for Norway, Sweden and Iceland***

*Table S4: Erodibility classes used in the SoilCare erodibility map*

| Erodibility class | K-factor values |
|-------------------|-----------------|
| 1                 | < 0.02          |
| 2                 | 0.02 – 0.028    |
| 3                 | 0.028 - 0.038   |
| 4                 | 0.038 – 0.046   |
| 5                 | > 0.046         |

For three countries, exceptions were made: Norway, Sweden and Iceland. In large parts of Iceland, and mountainous parts of Norway and northern Sweden, erodibility was classified as 5 (highest class) using the classification above and K-factor data. Except for bare rock and glacier areas, which were excluded, these areas consist of sparsely vegetated land cover and heather, usually on very thin soils and underlain by granite bedrock closely at the surface. As this bedrock is hardly erodible, combined with our Norwegian partner's observation that these areas produce very clean water (i.e. hardly any erosion), the erodibility classes for these areas were adapted by making two different maps and taking the minimum of both as follows:

Map 1:

The RUSLE K-factor was recalculated using equation 1 (Panagos et al., 2014):

$$K = [2.1 \cdot 10^{-4} * M^{1.14} * (12 - OM) + 3.25 \cdot (s - 2) + 2.5 \cdot (p - 3)] / 100 * 0.1317 \quad (1)$$

With  $M$  the textural factor (equation 2):

$$M = (m_{silt} + m_{sand}) * (100 - m_{clay}) \quad (2)$$

With  $m_{silt}$  = silt fraction (%),  $m_{sand}$  = sand fraction (%) and  $m_{clay}$  = clay fraction (%).

$OM$  = the organic matter content (%),  $s$  = the soil structure class (1 = very fine granular, 2 = fine granular, 3 = medium or coarse granular, 4 = blocky, platy or massive),  $p$  = the permeability class, ranging from 1 = very rapid to 6 = very slow.

Texture (clay, silt, sand fraction) and organic carbon data was derived from SoilGrids. Data on the permeability and structure was obtained from the ESDAC database. For soil structure, the topsoil structure data was used; for permeability the WR data (dominant annual average soil water regime class of the soil profile). Soil structure was converted from Good, Normal, Poor and Humic or Peaty to structure classes 1, 2, 3 and 4 respectively following Panagos et al. (2015). Water regime (WR) classes 0 – 4 were converted to permeability classes 2-5 respectively.

This resulted in a new K-factor map that was classified into erodibility classes 1 to 3

Map 2:

Based on the Corine Land Classification 2018 map, land use class 'sparsely vegetated areas' (CLC value 32) was given an erodibility value of 1 – these areas were observed to be very close to / bordering the bare rock areas. Land use class 'heathland' (CLC value 27) was given an erodibility of 2, as these areas were in turn bordering the sparsely vegetated areas. Any remaining areas with erodibility classes 4 or 5 were set to a maximum erodibility class 3.

These two maps were finally combined, taking the minimum of both maps (Fig. 5). According to feedback from local Norwegian partners, the resulting map would better represent the erodibility in the mountainous areas in Norway and test runs with the PESERA model indeed showed much lower, and more realistic erosion values for these areas.

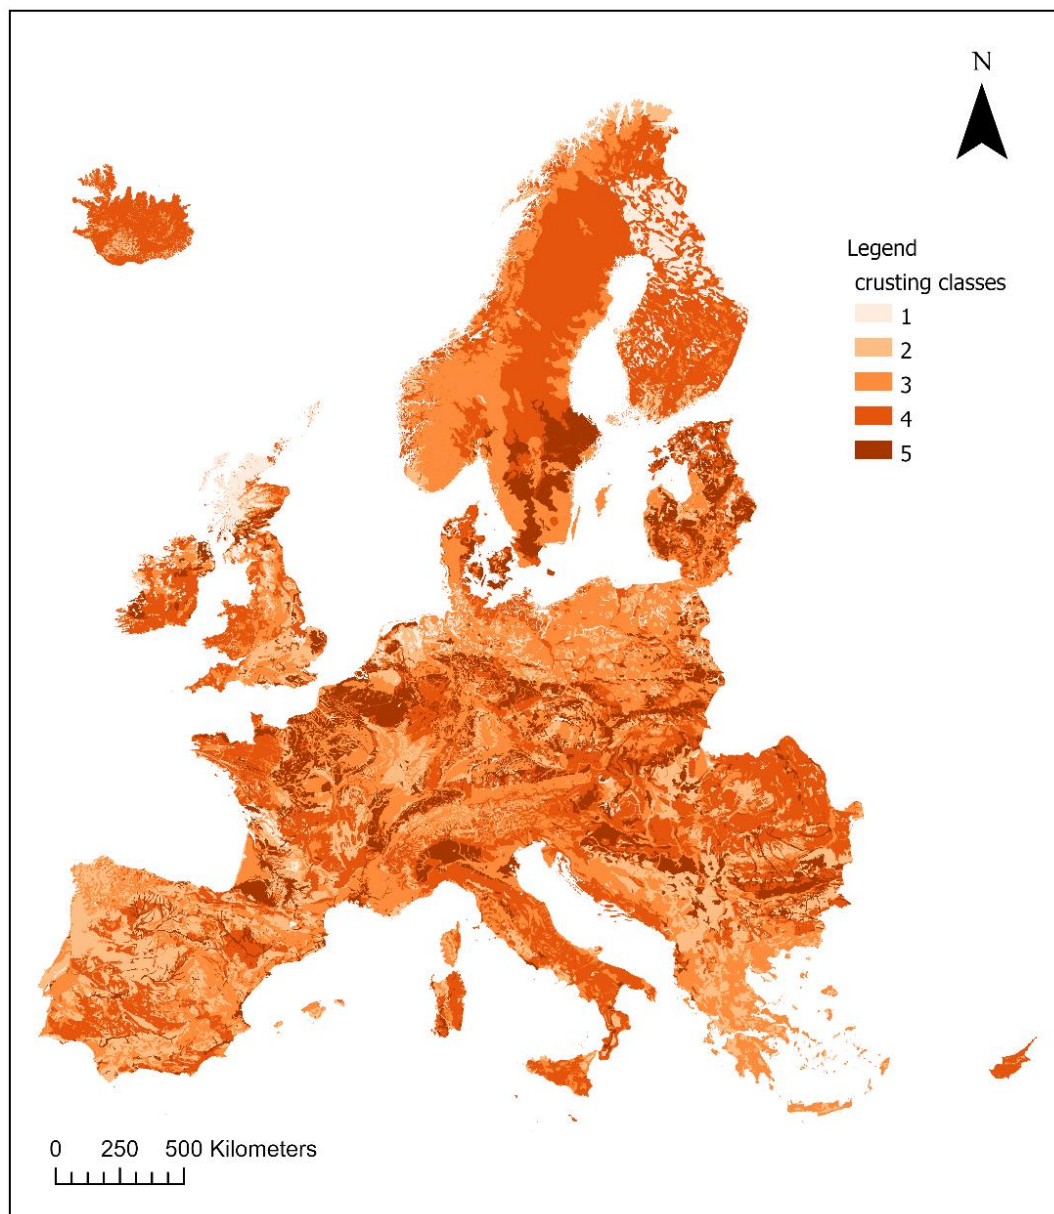

Figure S1: Input crusting map for Europe

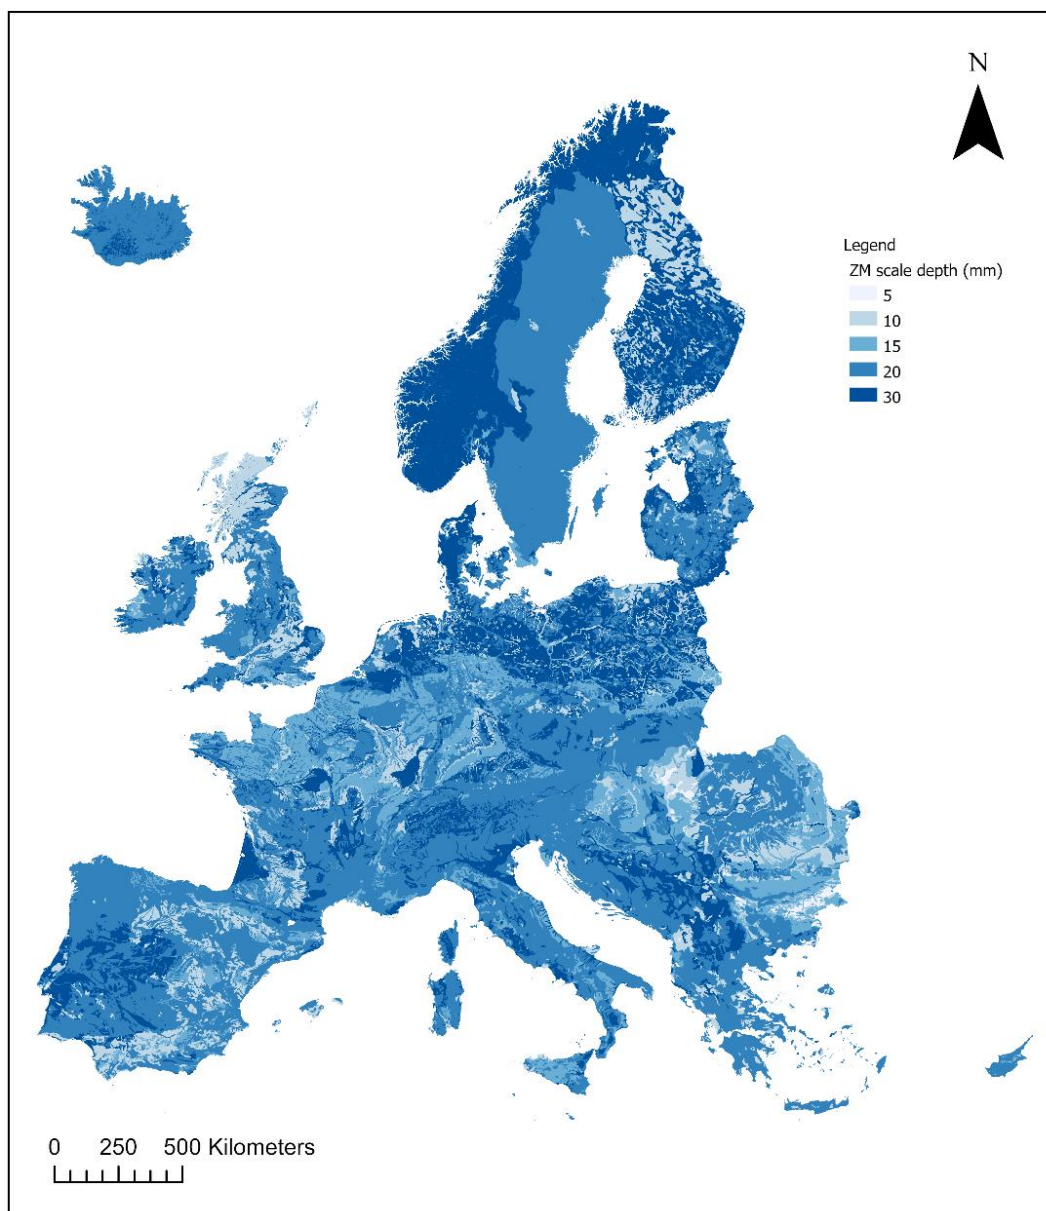

Figure S2: Scaling depth input map for Europe

Table S5: Soil Texture and corresponding scale depth values (mm)

| Soil Texture  |    | Scale depth (mm) |
|---------------|----|------------------|
| Coarse        | C  | 30               |
| Fine          | F  | 10               |
| Medium        | M  | 20               |
| Medium Fine   | MF | 15               |
| Organic Soils | O  | 10               |
| Very fine     | VF | 5                |

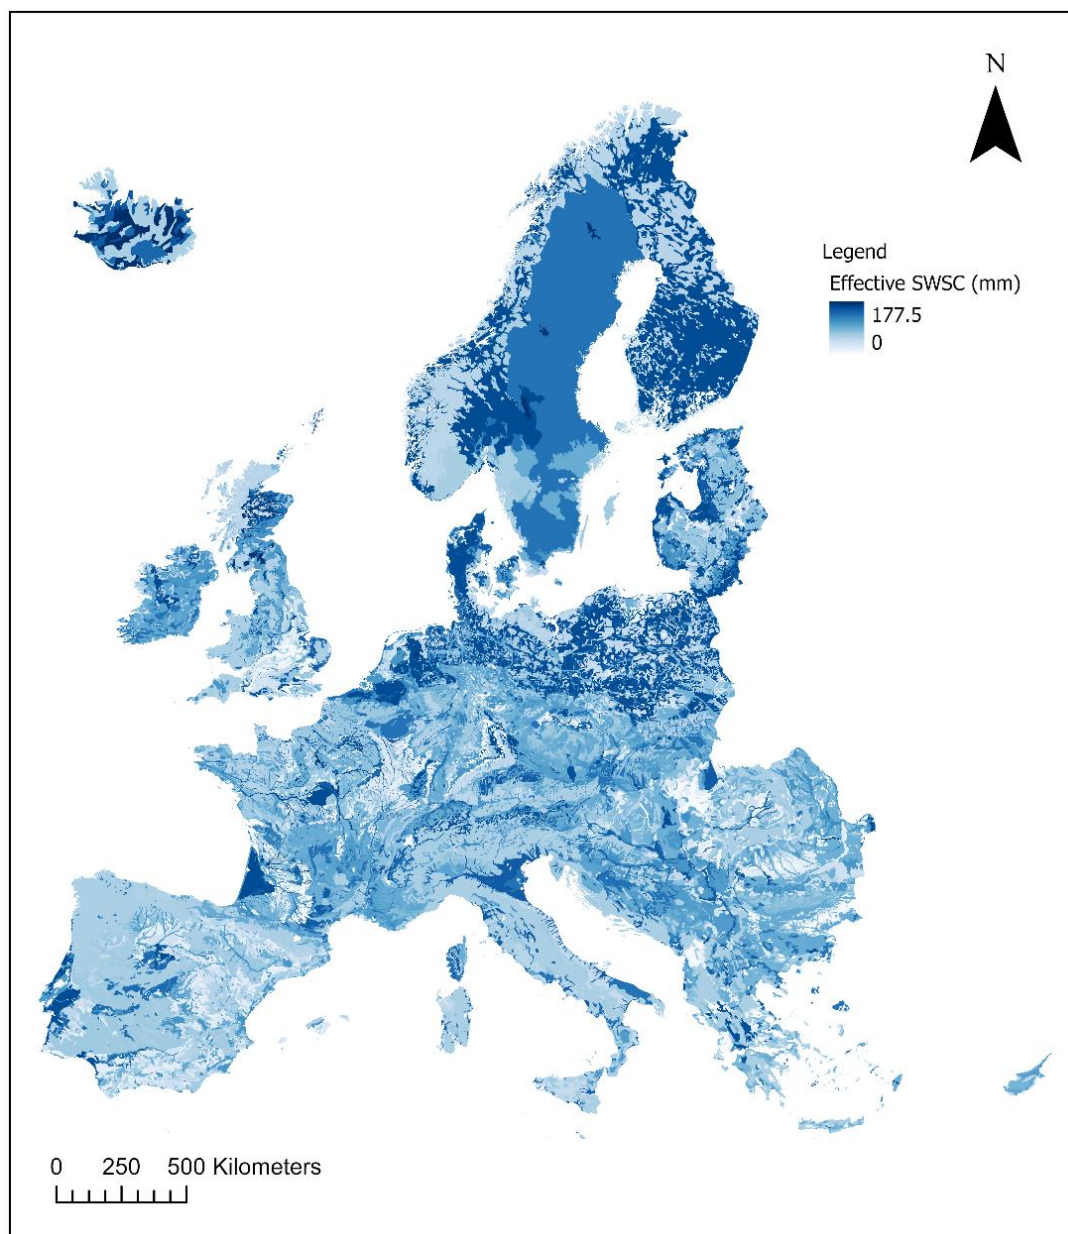

Figure S3: Effective soil water storage capacity or Europe



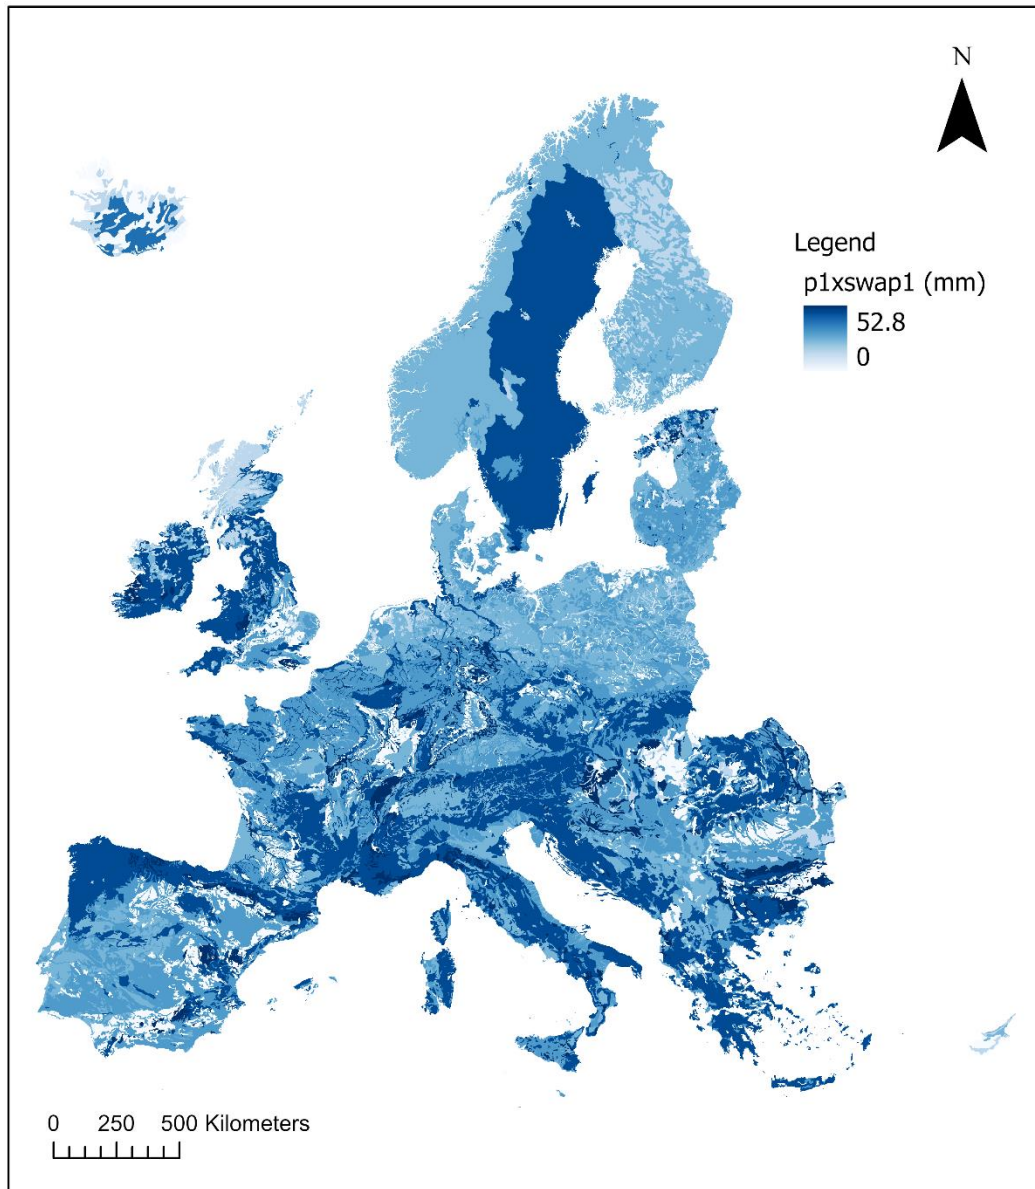

Figure S4: Soil water available to plants (0-300mm)

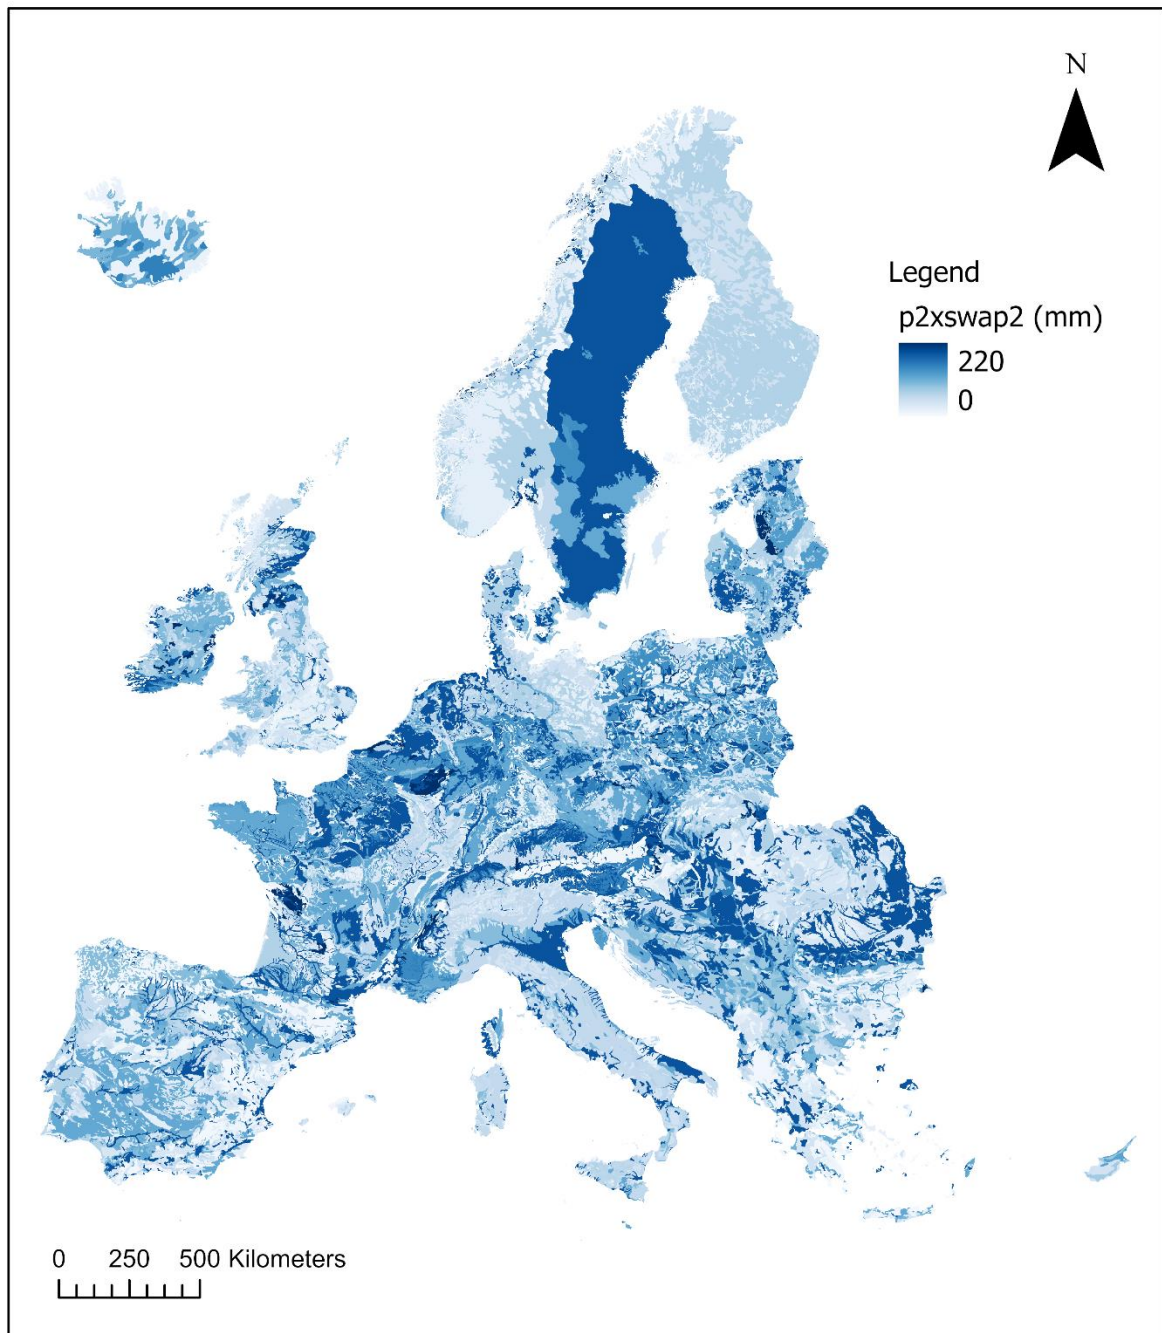

Figure S5: Soil water available to plants (300-1000mm)



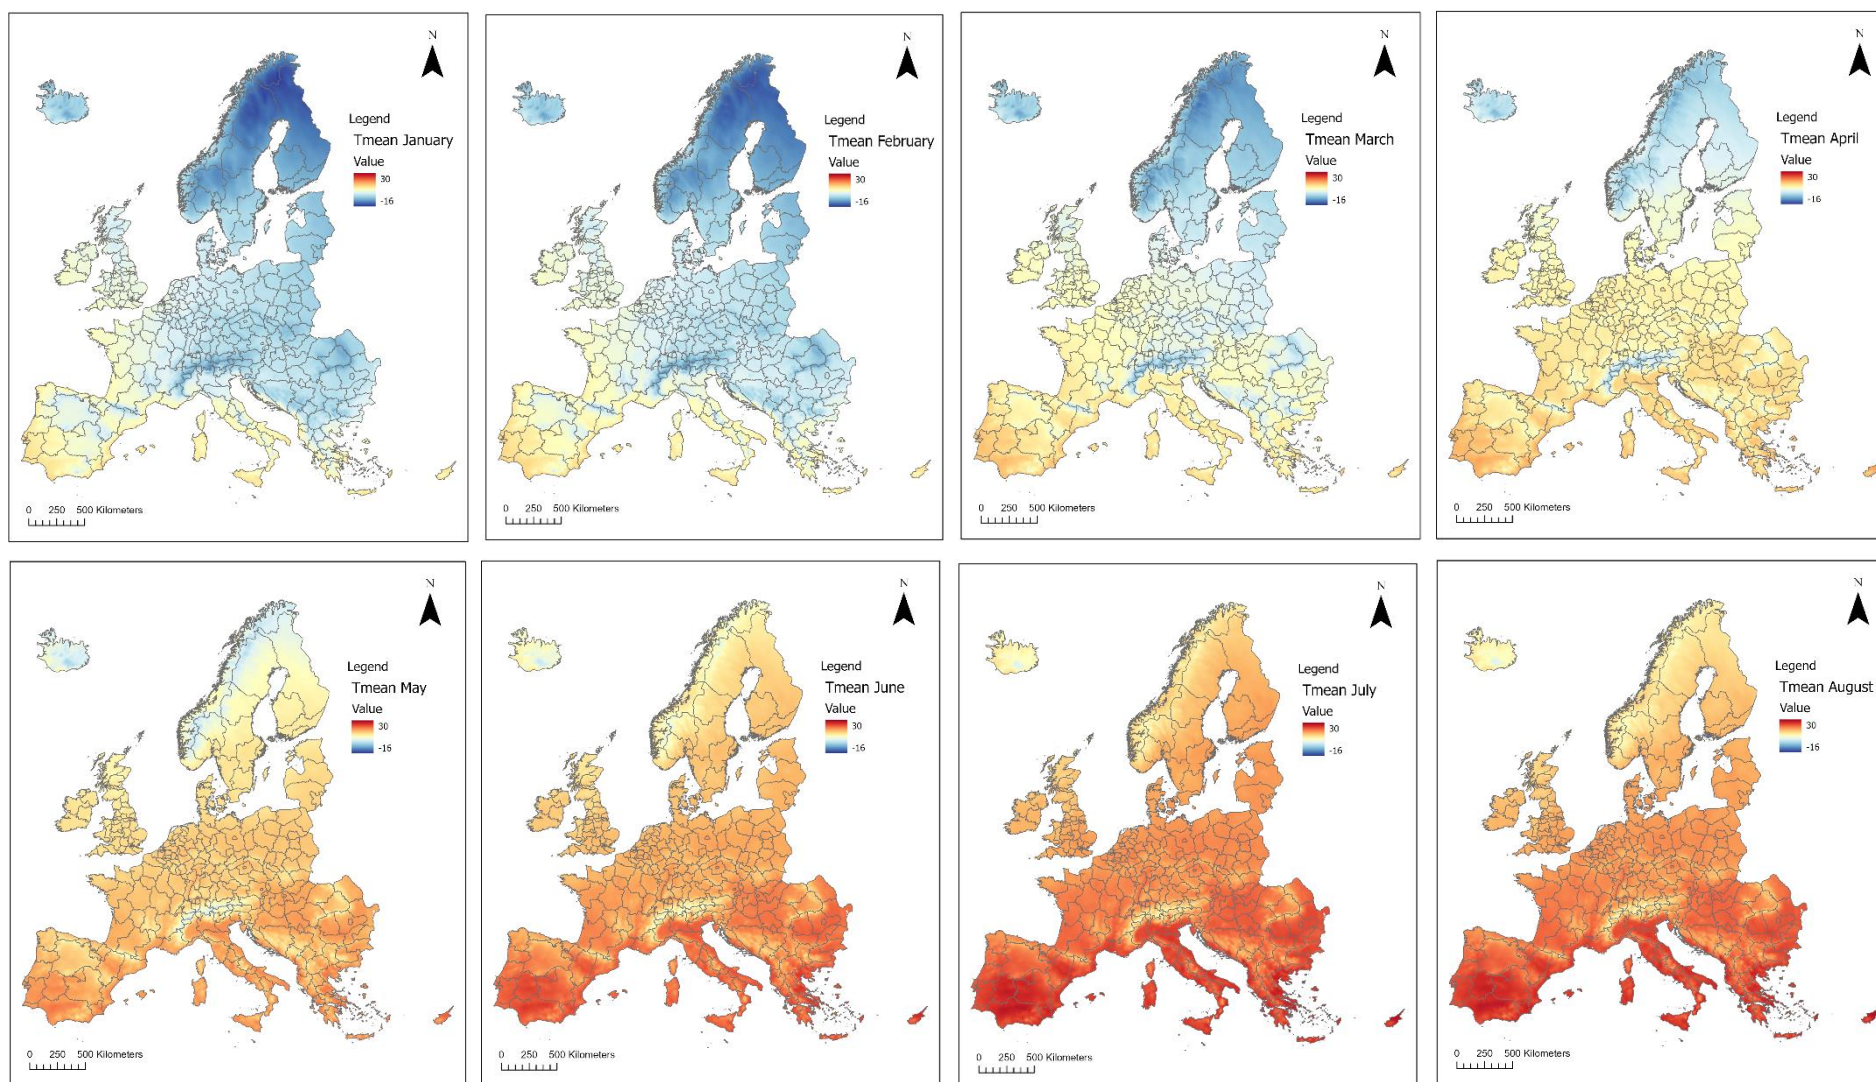

Figure S6: Mean temperature input maps (equilibrium version; average for 1981-2020) for each month

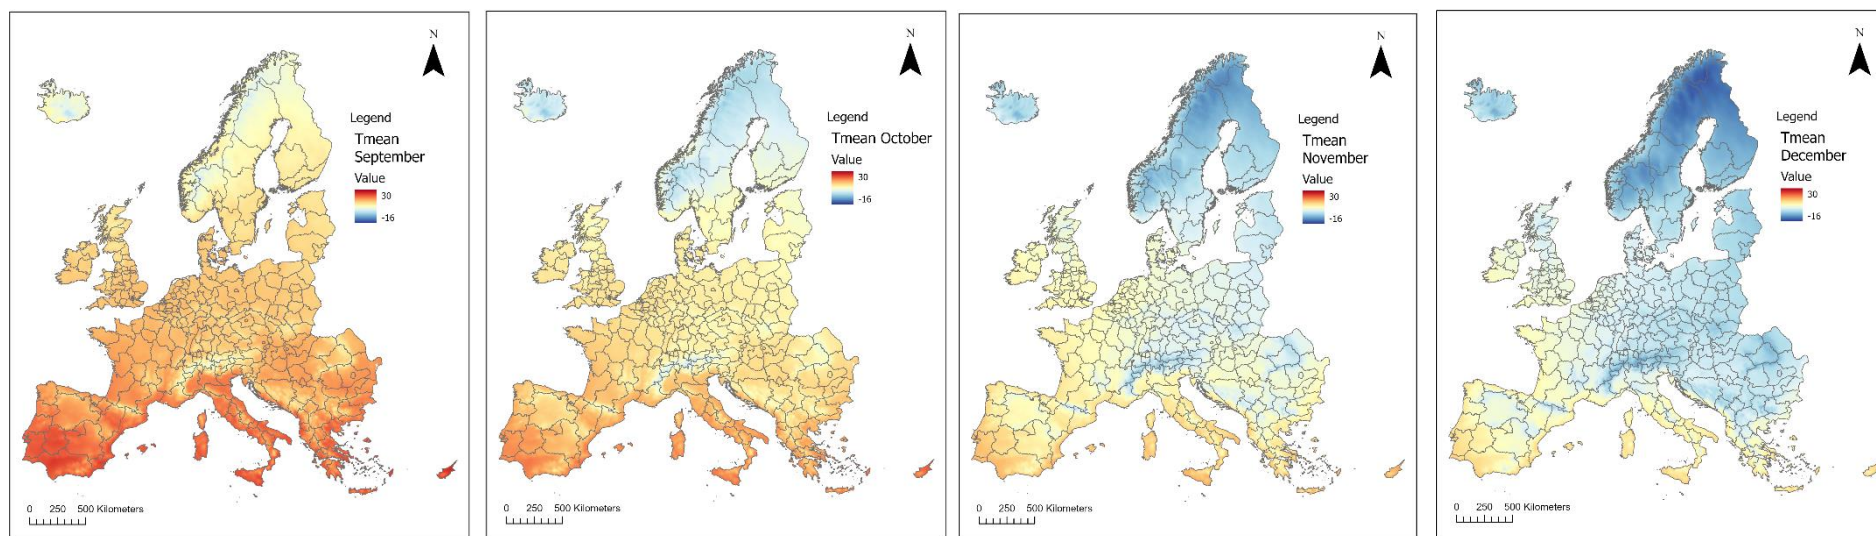

Figure S6 (continued): Mean temperature input maps (equilibrium version; average for 1981-2020) for each month



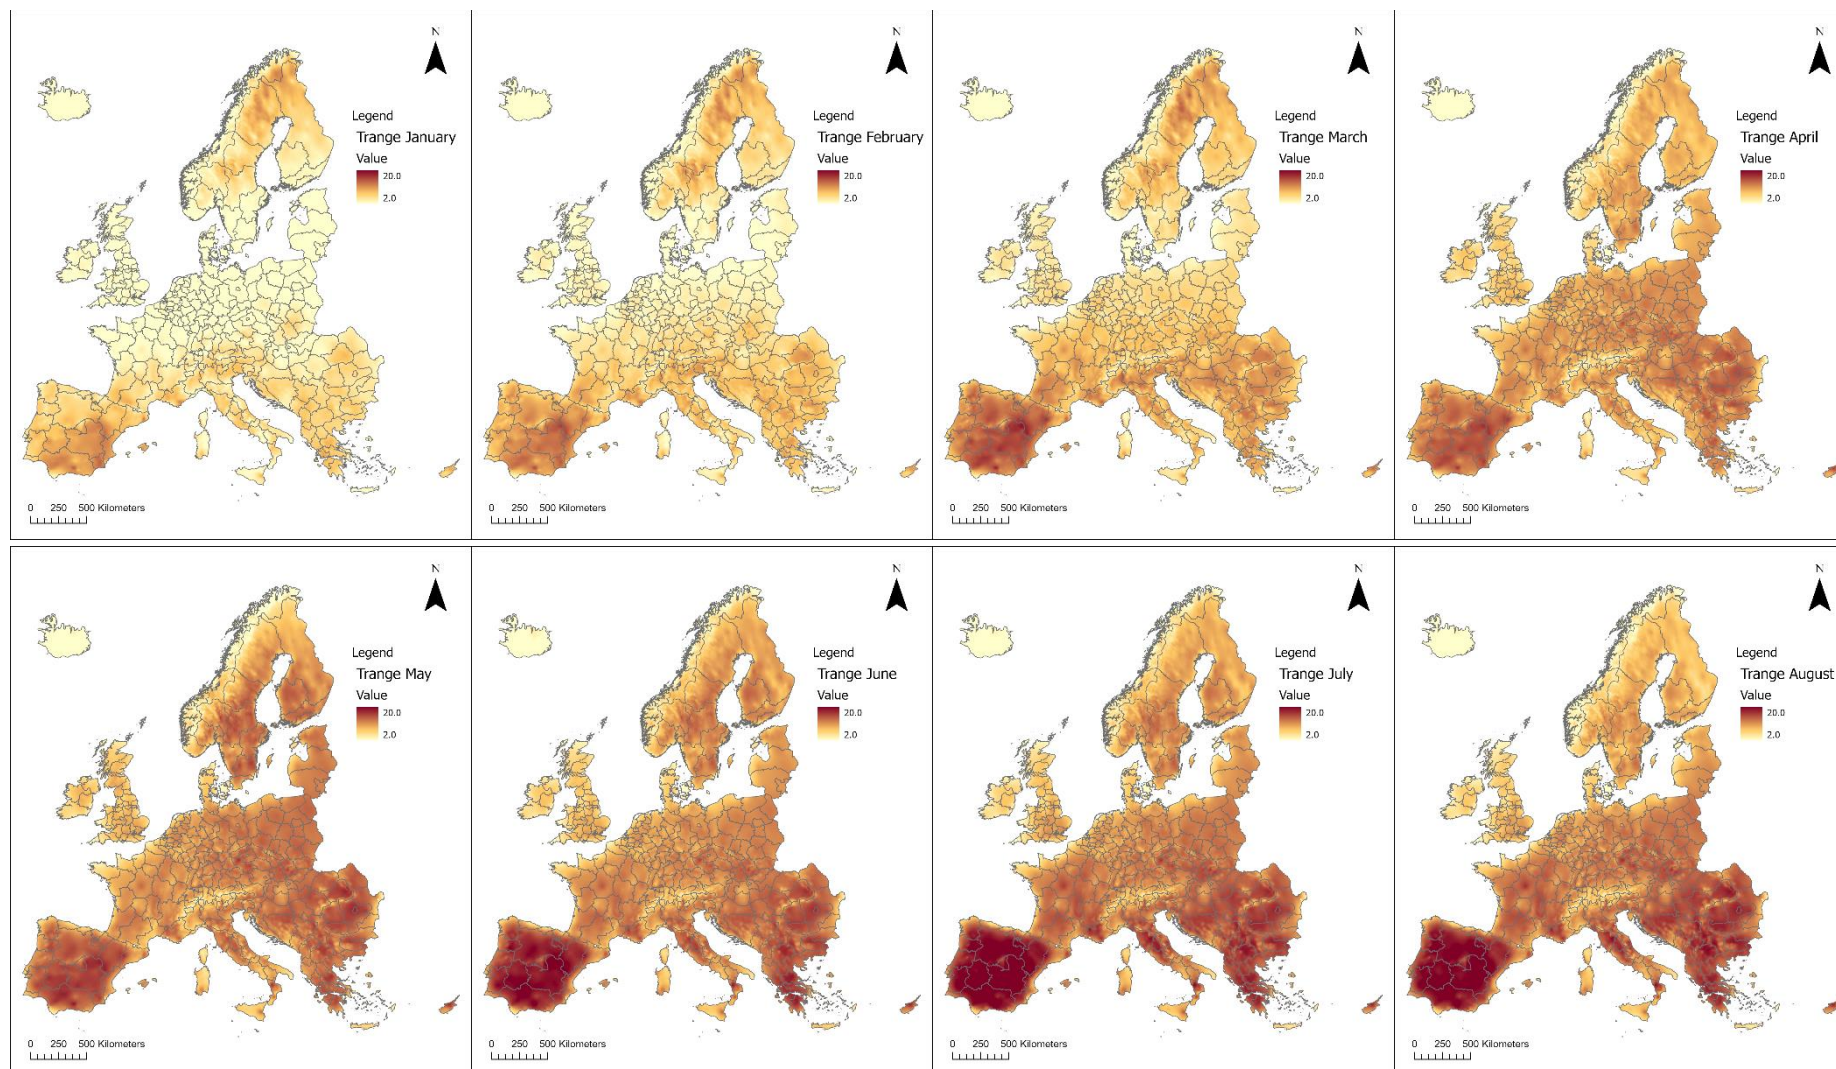

Figure S7: Temperature range input maps (equilibrium version; average for 1981-2020) for each month

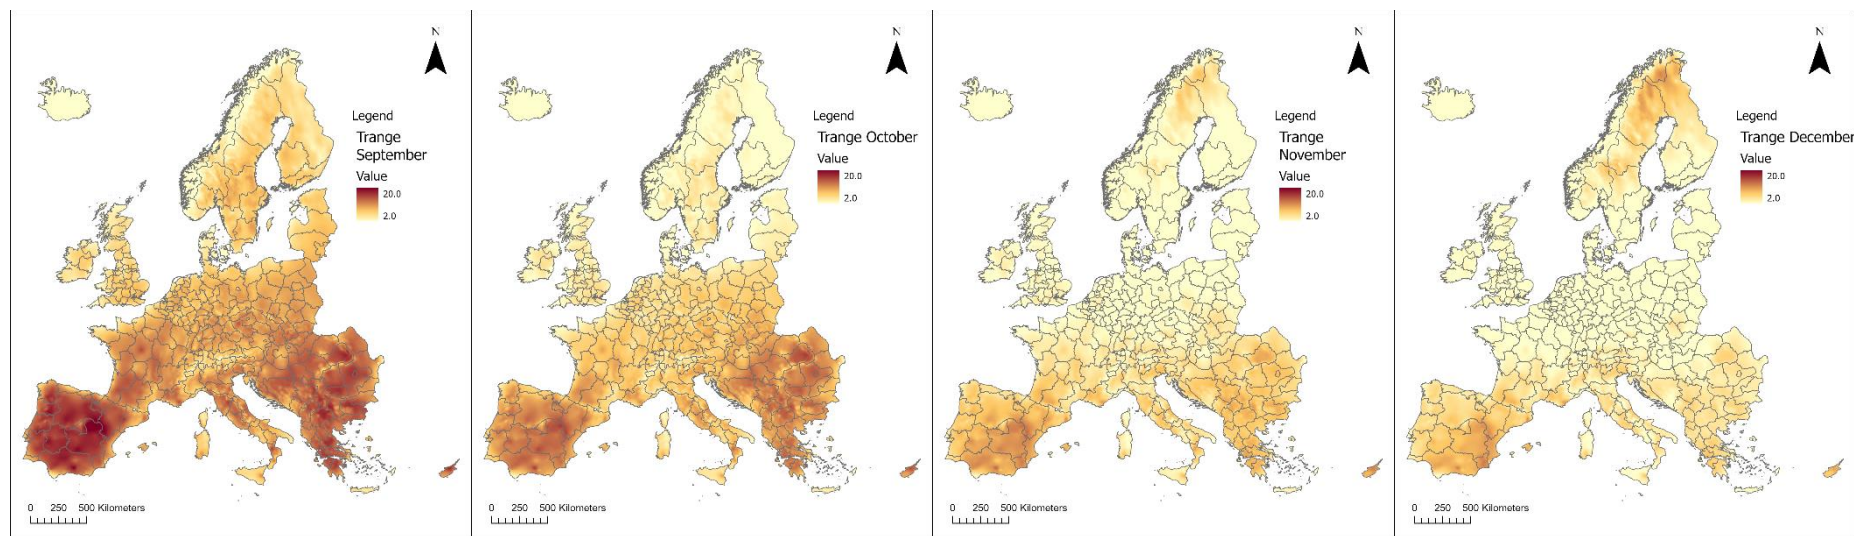

Figure S7 (continued): Temperature range input maps (equilibrium version; average for 1981-2020) for each month



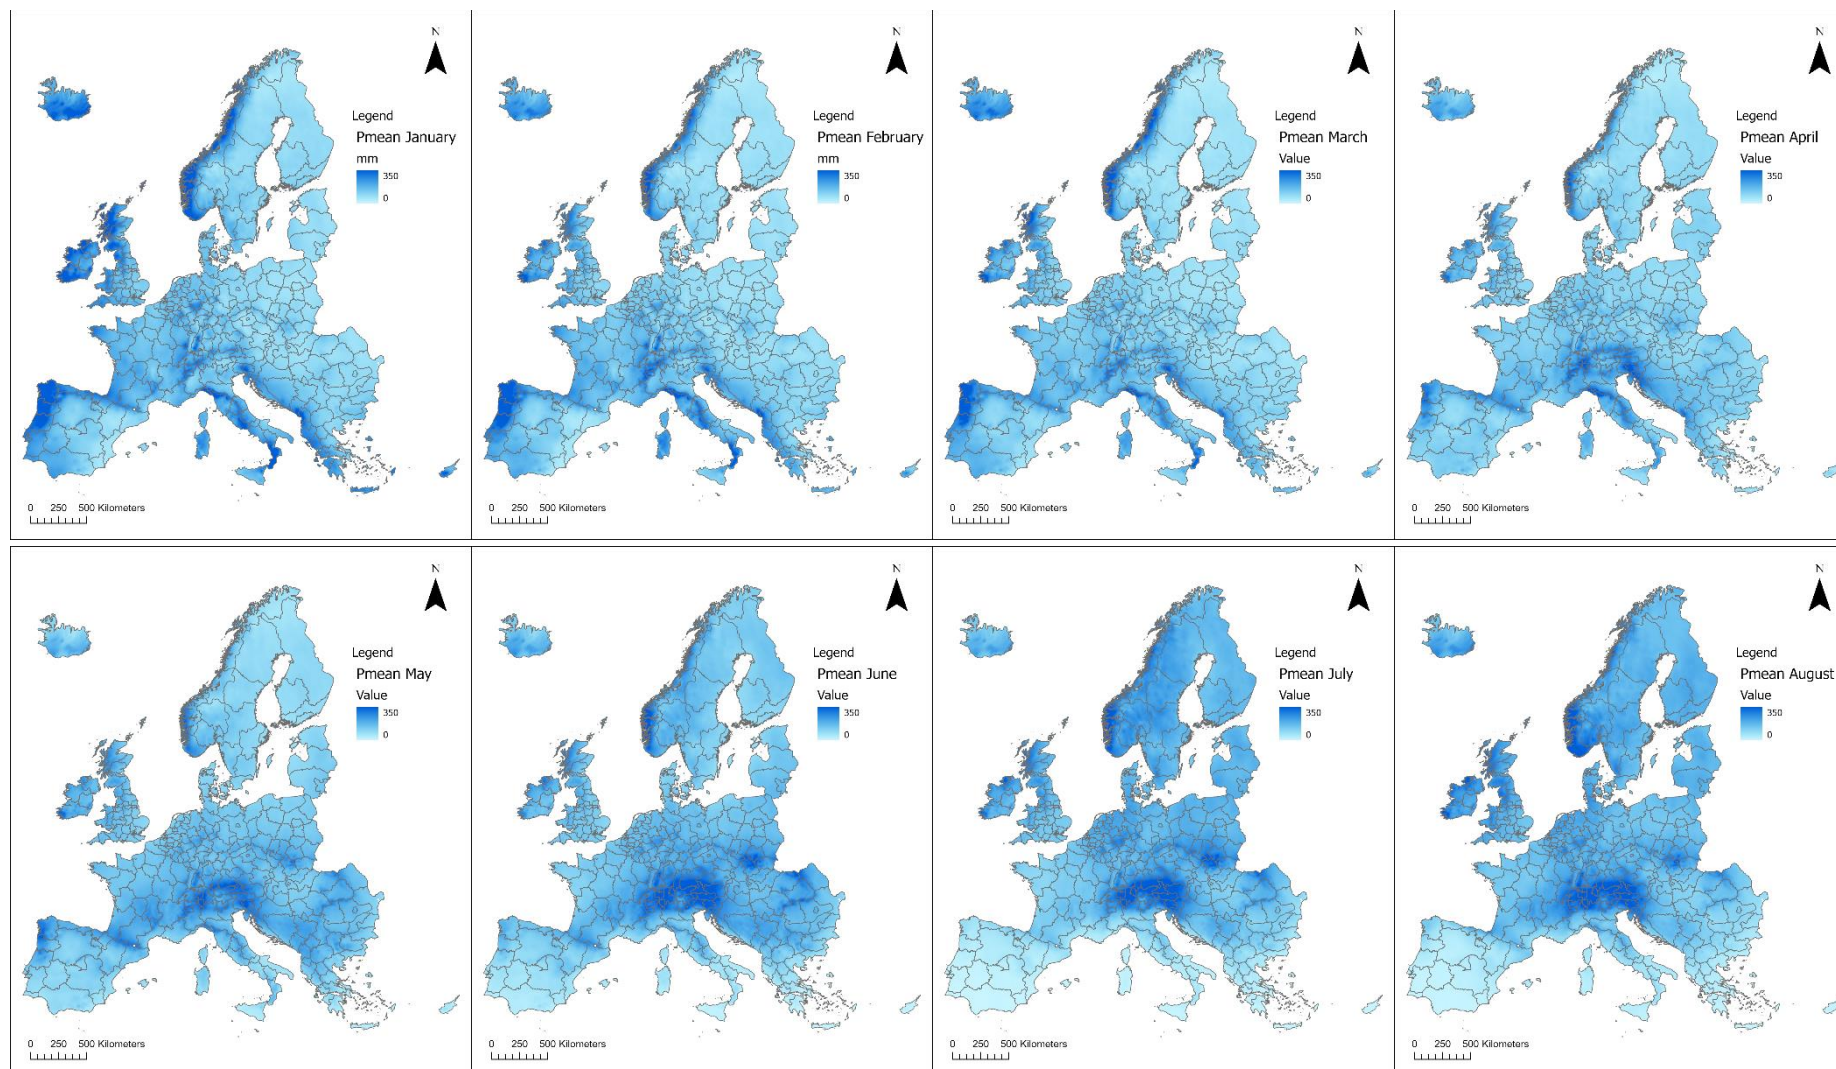

Figure S8: Mean rainfall input maps (equilibrium version; average for 1981-2020) for each month



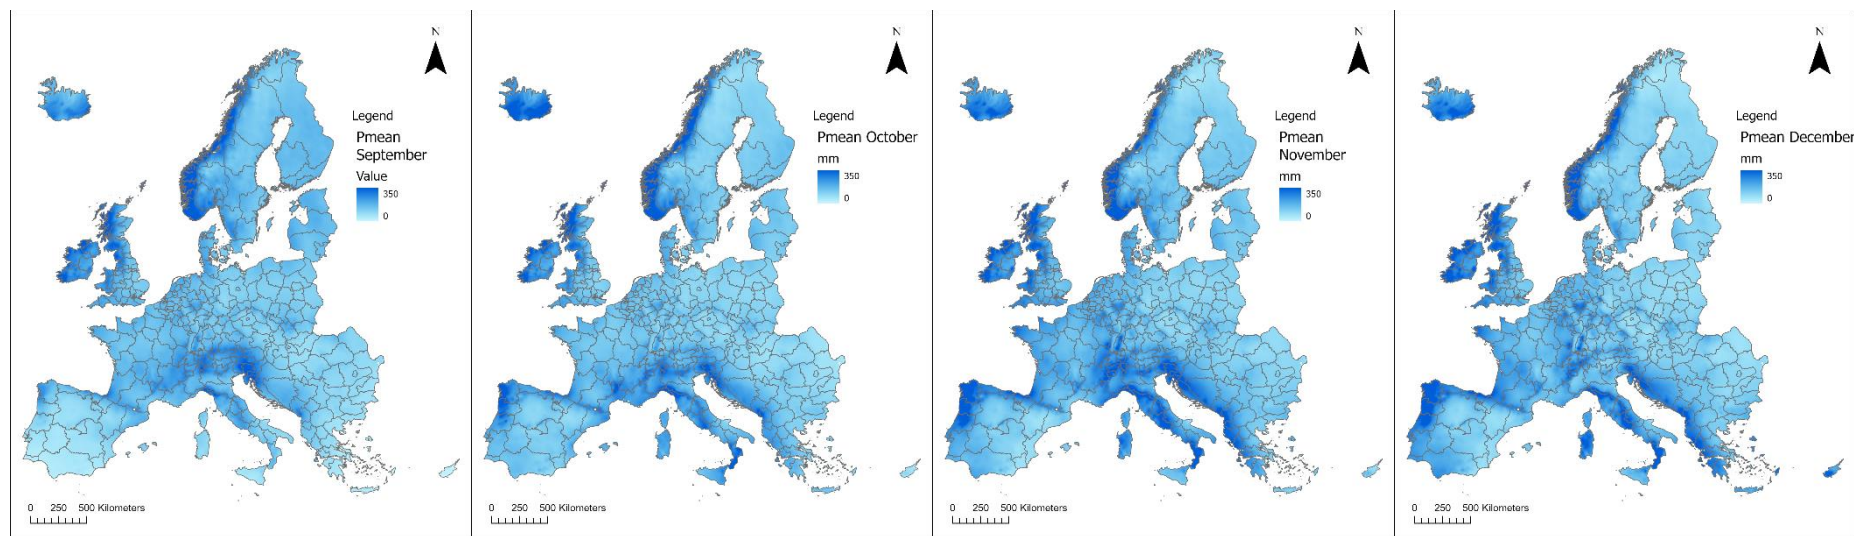

Figure S8 (continued): Mean rainfall input maps (equilibrium version; average for 1981-2020) for each month

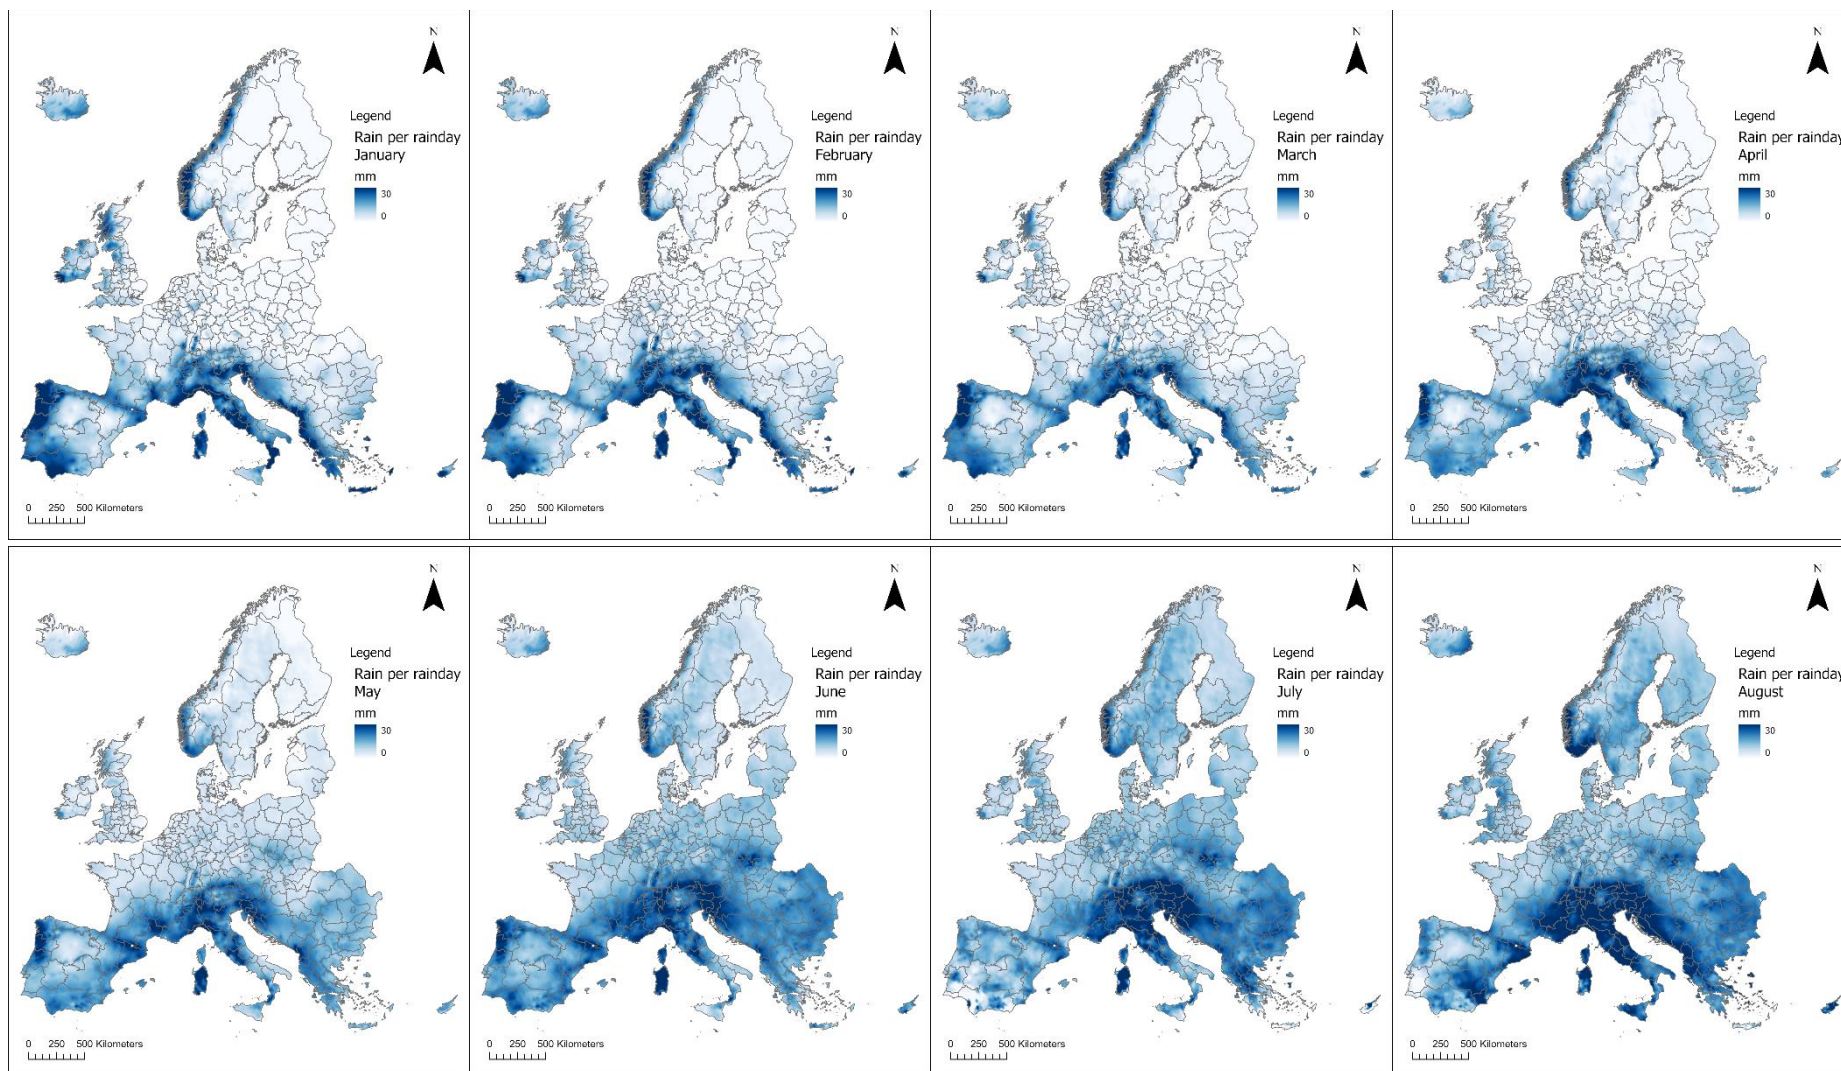

Figure S9: Rainfall per rain day input maps (equilibrium version; average for 1981-2020) for each month

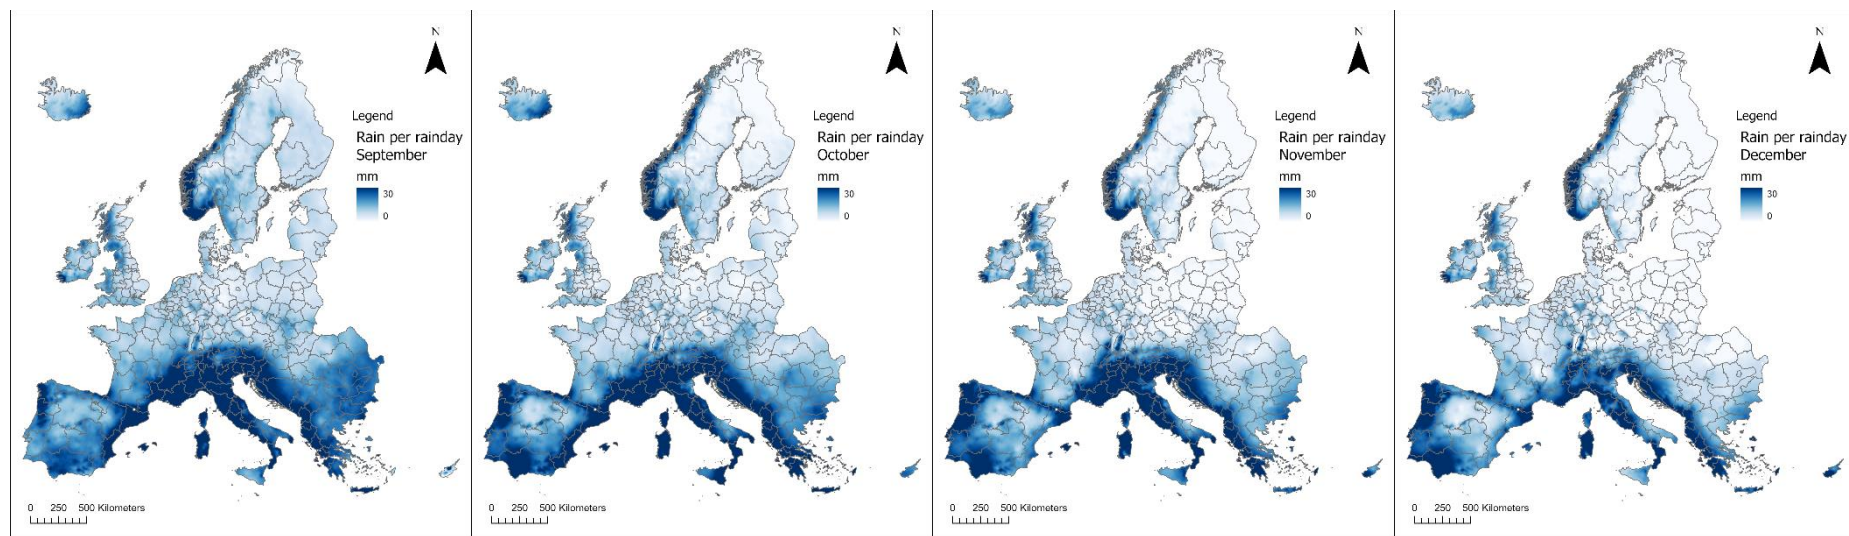

Figure S9 (continued): Rainfall per rain day input maps (equilibrium version; average for 1981-2020) for each month



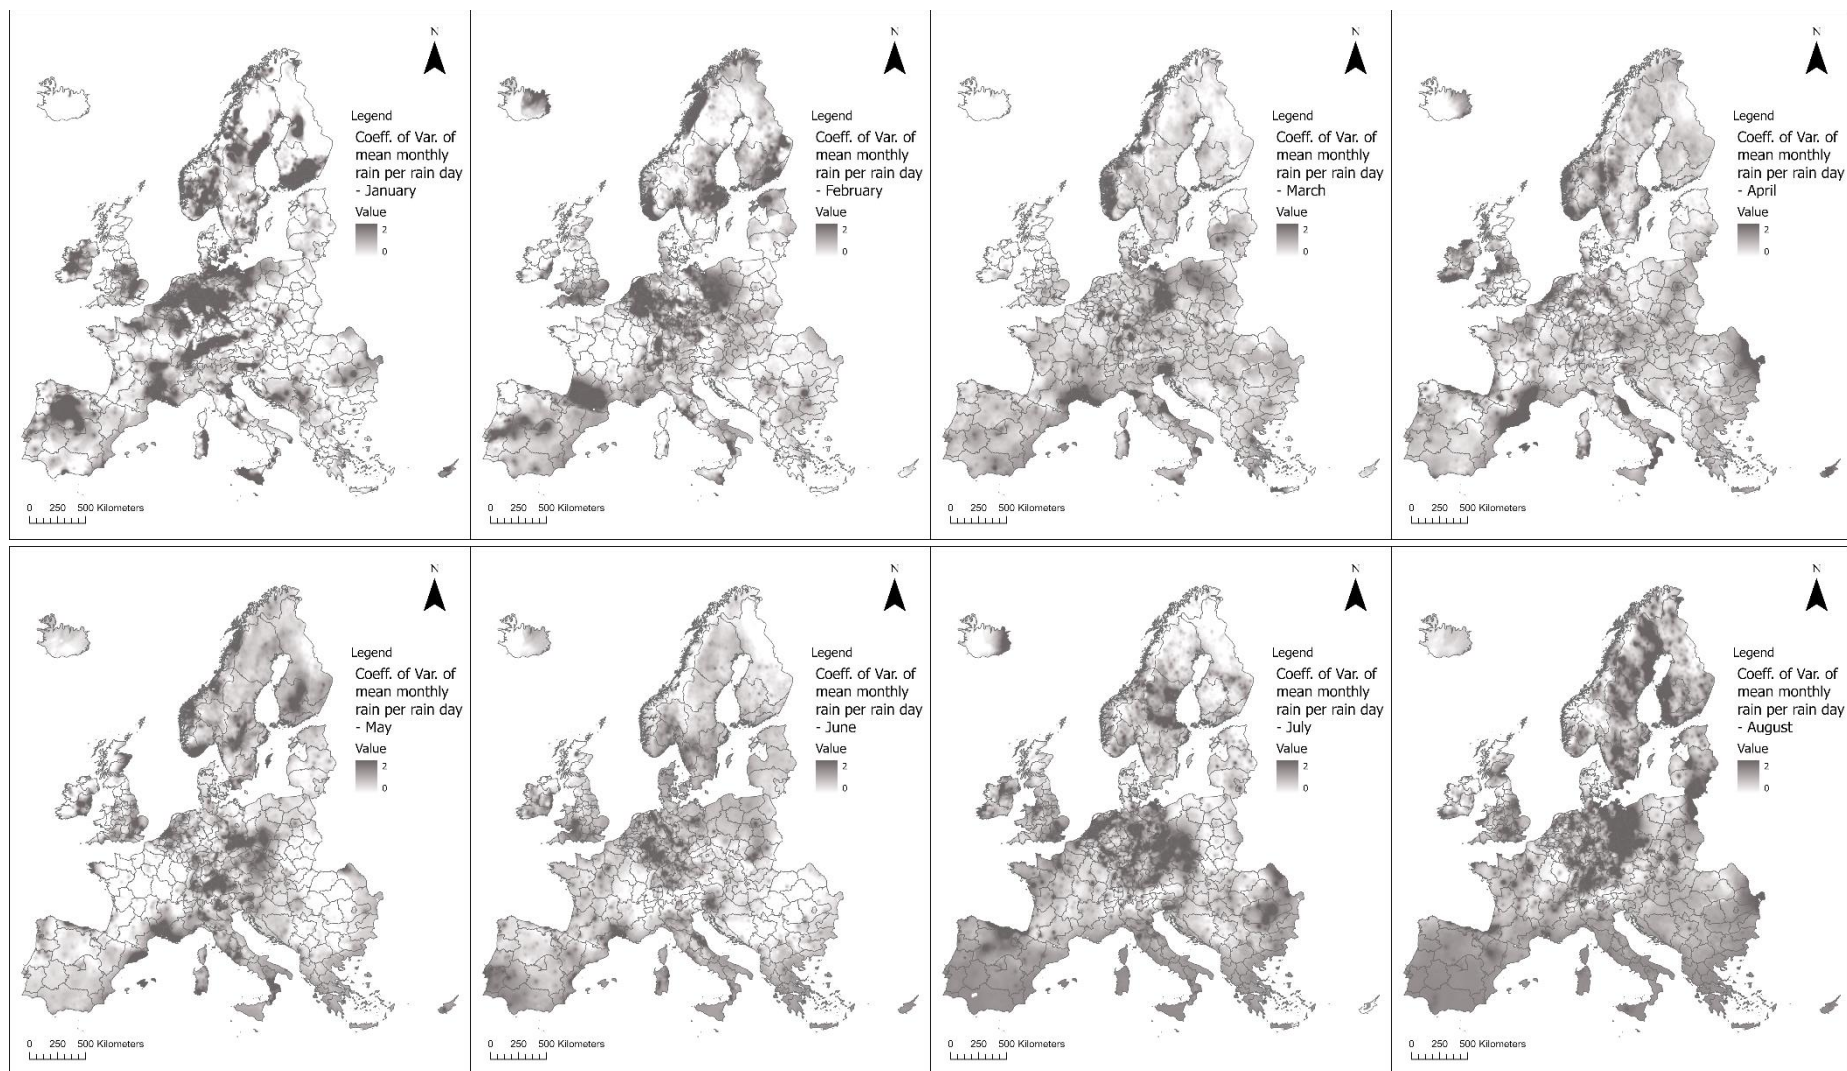

Figure S10: Coefficient of variation of mean monthly rainfall per rain day input maps (equilibrium version; average for 1981-2020)

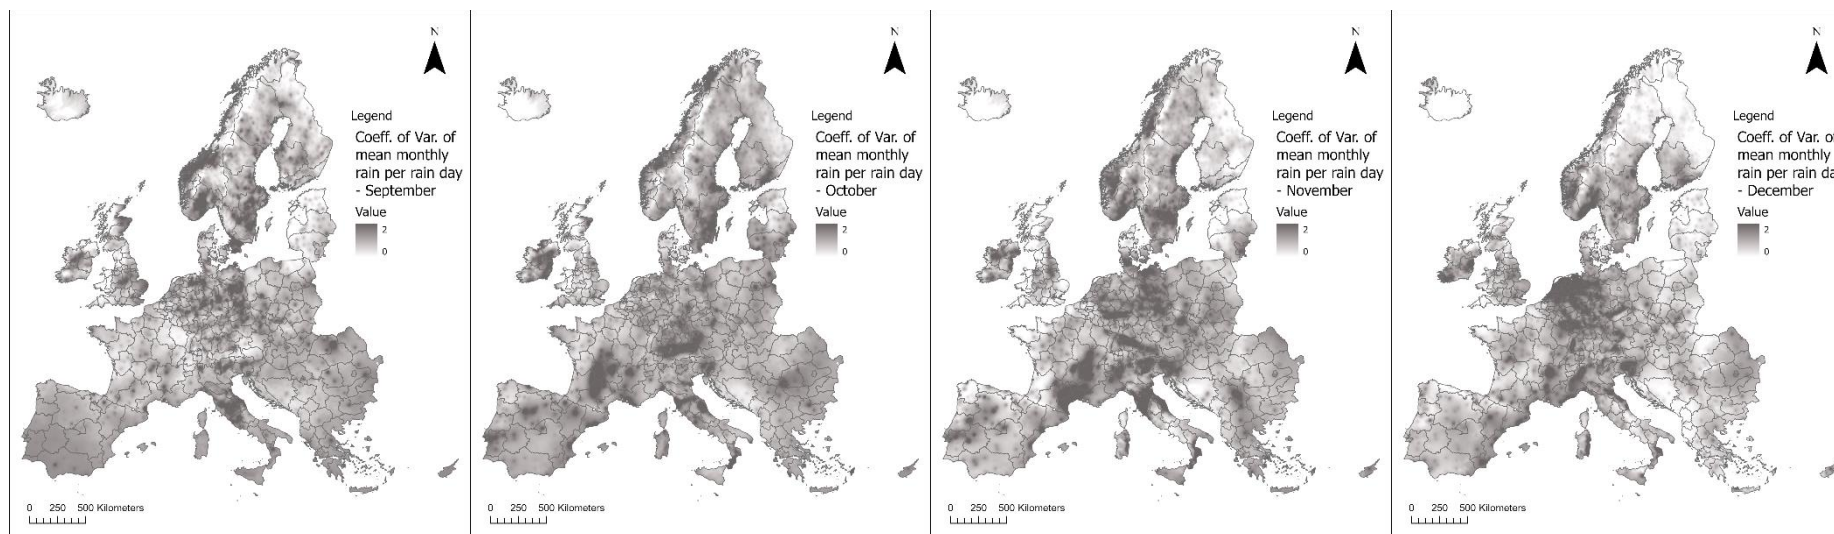

Figure S10 (continued): Coefficient of variation of mean monthly rainfall per rain day input maps (equilibrium version; average for 1981-2020)



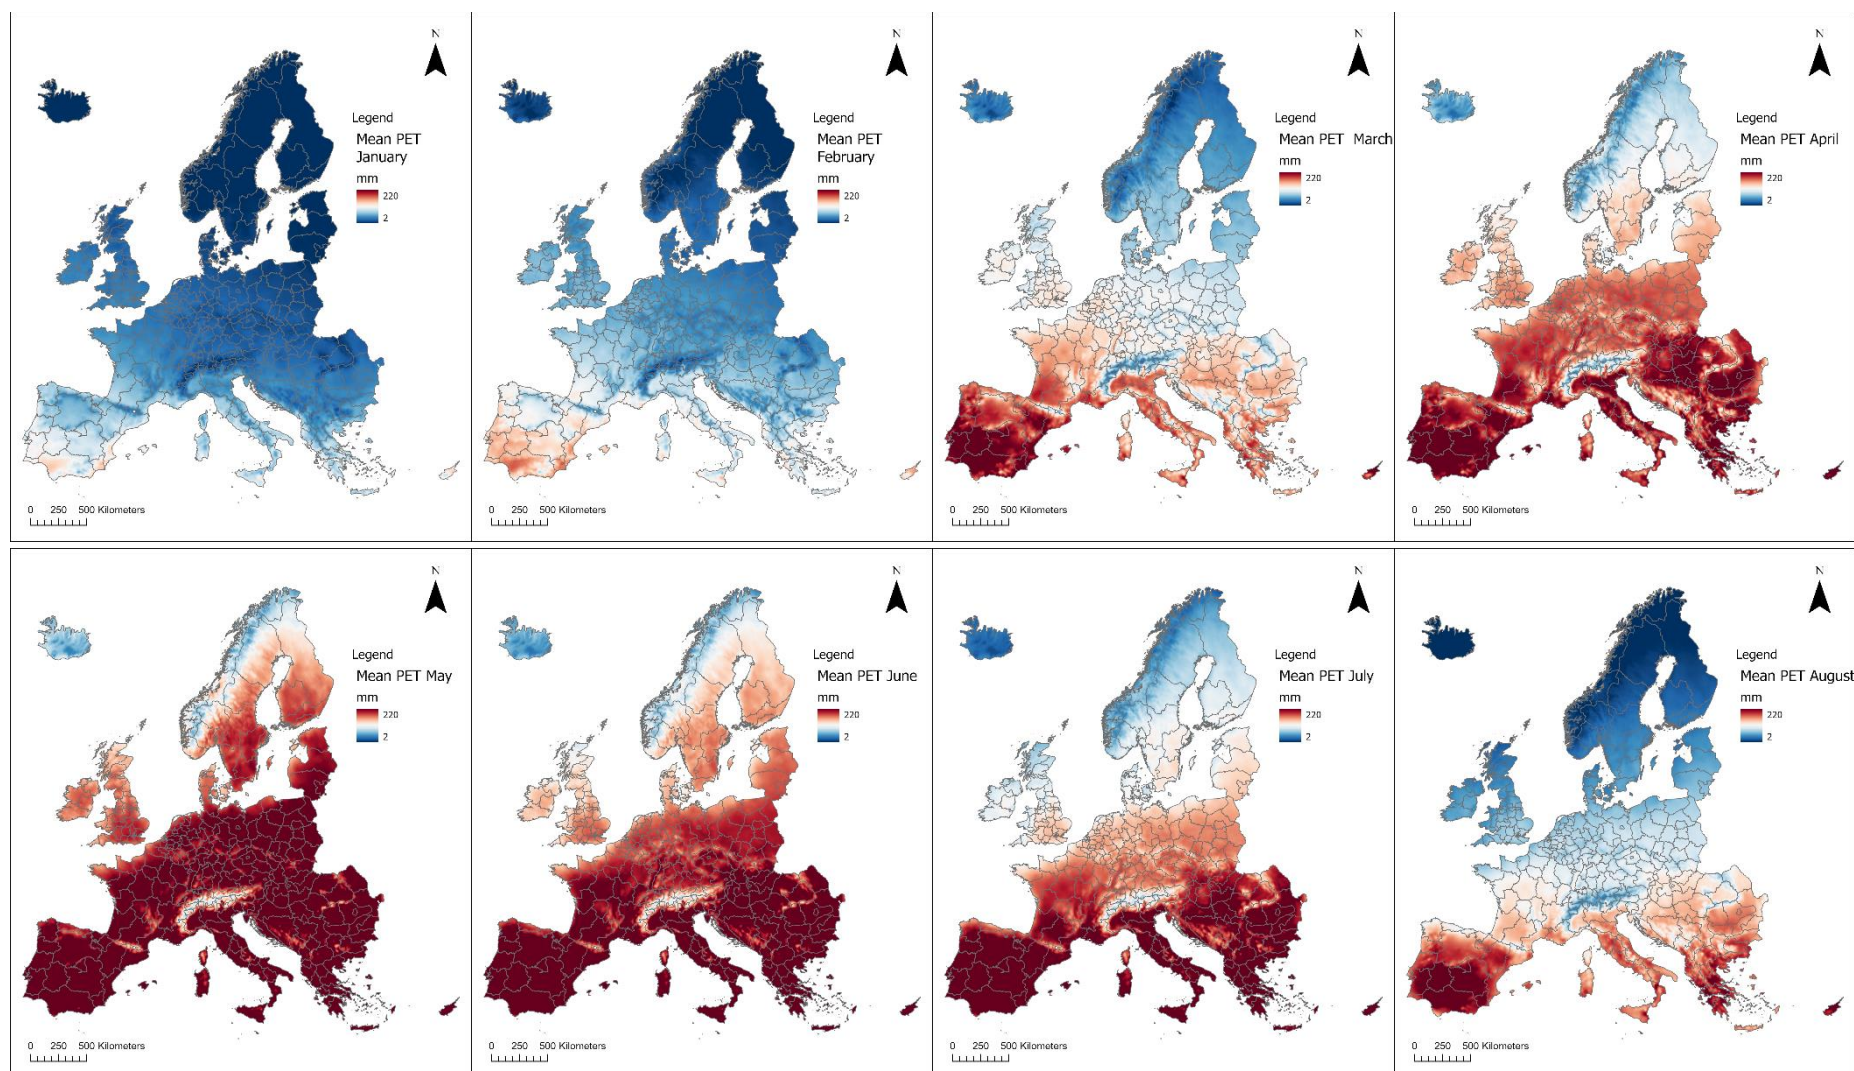

Figure S11: Mean PET input maps (equilibrium version; average for 1981-2020)

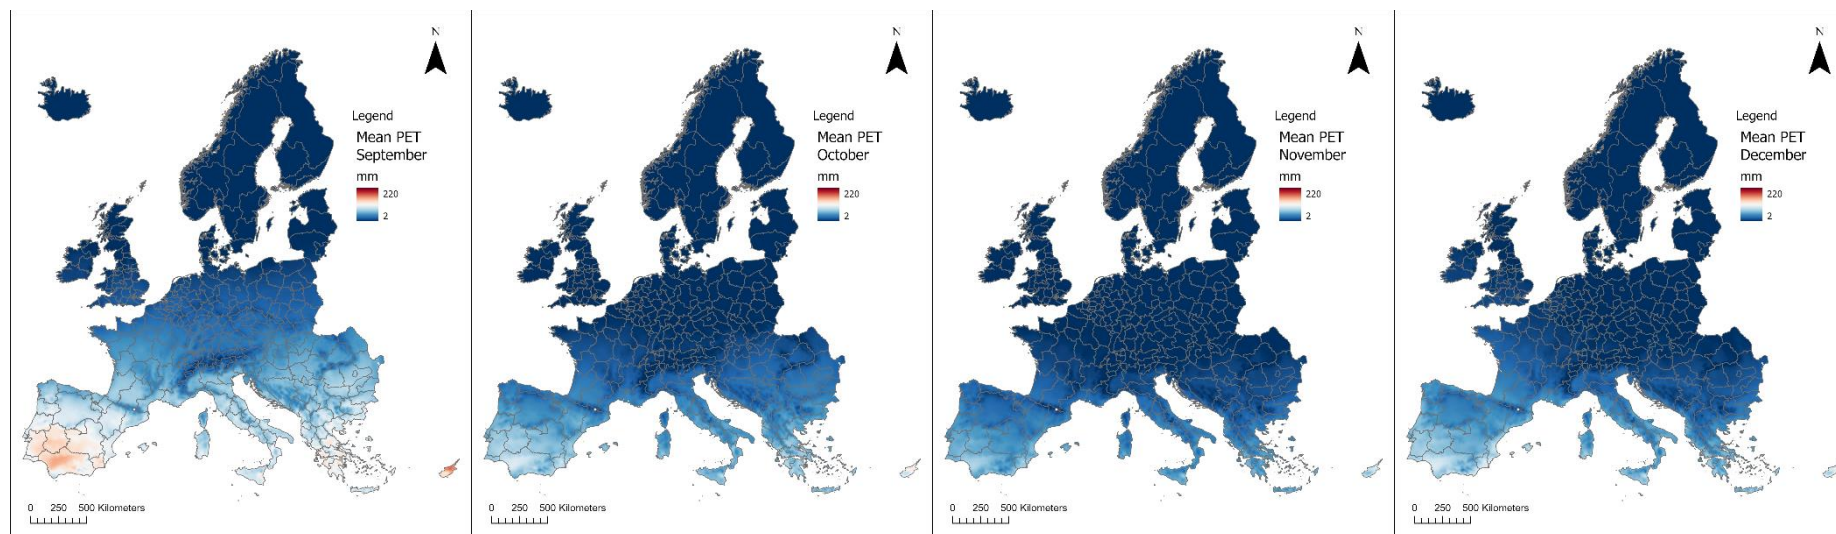

Figure S11 (continued): Mean PET input maps (equilibrium version; average for 1981-2020)
