# Supplementary material for: The Effects of Soil Improving Cropping Systems (SICS) on Soil Erosion and Soil Organic Carbon Stocks across Europe: A Simulation Study
Source: MDPI journal article supplement (doi:10.3390/land11060943), 2022-06-19
Supplement: s1 [file s1]

**Supplimentary material S4:**

**Simulated erosion maps for the baseline (RttB 2020) and four scenarios (2050)**

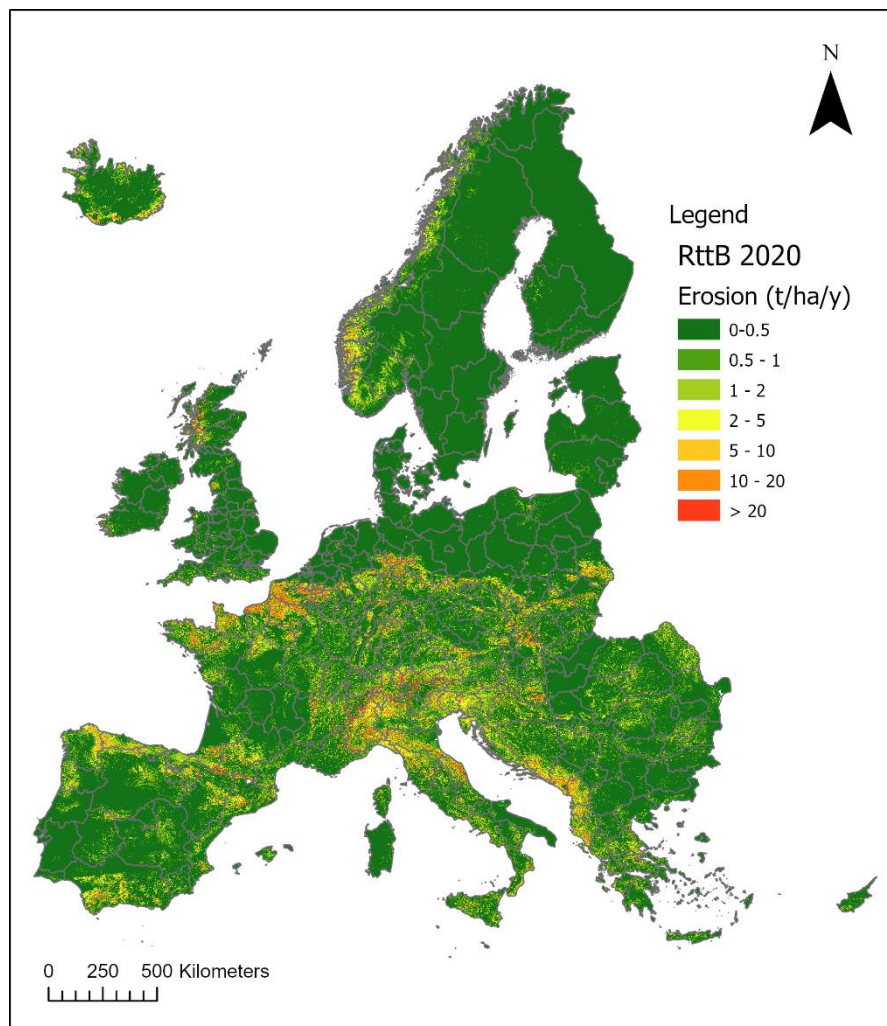

Figure S19: Simulated erosion for the baseline (RttB) 2020

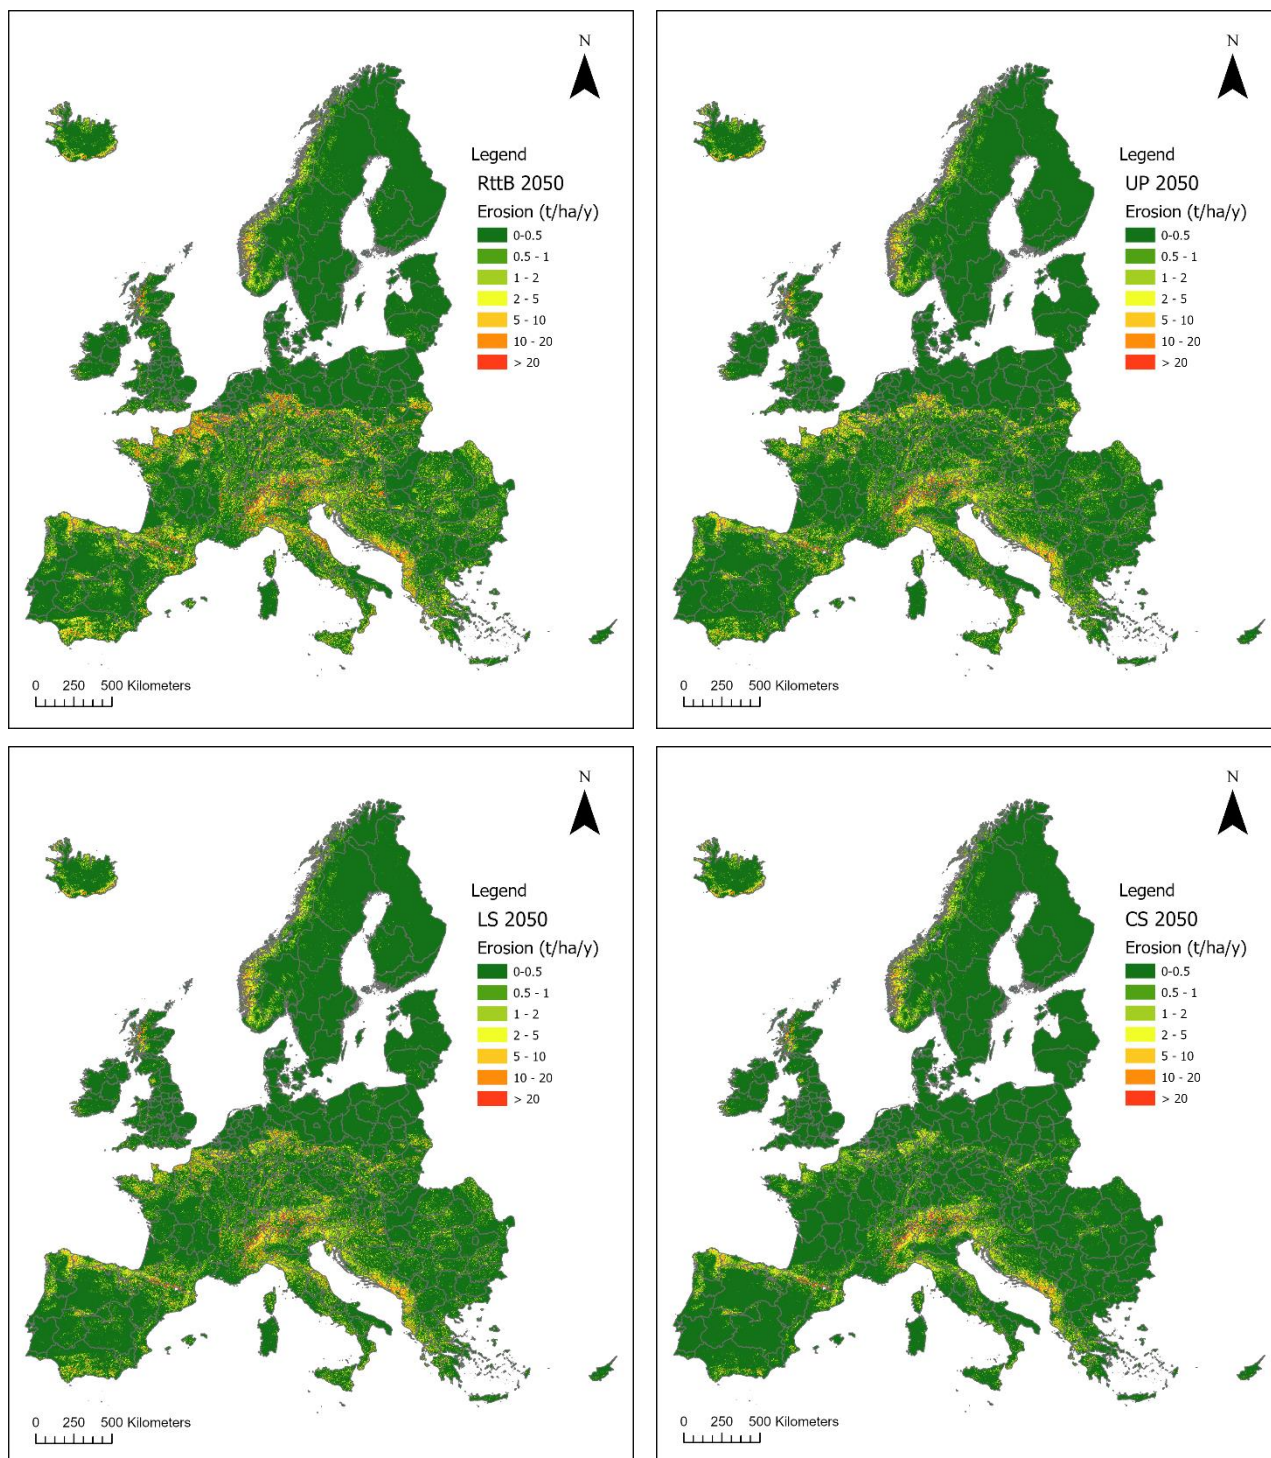

Figure S20: Simulated erosion for the four scenarios for year 2050.
