# Supplementary material for: The Effects of Soil Improving Cropping Systems (SICS) on Soil Erosion and Soil Organic Carbon Stocks across Europe: A Simulation Study
Source: MDPI journal article supplement (doi:10.3390/land11060943), 2022-06-19
Supplement: s1 [file s1]

### Supplementary material S3:

Table S7: Meta-analyses used to compare the simulated effect of measures versus control conditions on soil erosion and soil organic matter.

|    |                               |                                                                                                                                                                                                                                                                                                                                                      |
|----|-------------------------------|------------------------------------------------------------------------------------------------------------------------------------------------------------------------------------------------------------------------------------------------------------------------------------------------------------------------------------------------------|
| 1  | Aguilera et al. 2013          | Aguilera E., Lassaletta L., Gattinger A., Gimeno B.S. 2013. Managing soil carbon for climate change mitigation and adaptation in Mediterranean cropping systems: A meta-analysis. <i>Agriculture, Ecosystems and Environment</i> 168: 25–36. <a href="http://dx.doi.org/10.1016/j.agee.2013.02.003">http://dx.doi.org/10.1016/j.agee.2013.02.003</a> |
| 2  | Angers and Eriksen-Hamel 2008 | Angers D.A., Eriksen-Hamel N.S. 2008. Full-Inversion Tillage and Organic Carbon Distribution in Soil Profiles: A Meta-Analysis. <i>Soil Sci. Soc. Am. J.</i> 72: 1370-1374. doi:10.2136/sssaj2007.0342                                                                                                                                               |
| 3  | Chen et al. 2020              | Chen G., Liu S., Xiang Y., Tang X., Liu H., Yao B., Luo X. 2020. Impact of living mulch on soil C:N:P stoichiometry in orchards across China: A meta-analysis examining climatic, edaphic, and biotic dependency. <i>Pedosphere</i> 30(2): 181–189. doi:10.1016/S1002-0160(20)60003-0                                                                |
| 4  | Cooper et al. 2016            | Cooper J., Baranski M., Stewart G. et al. 2016. Shallow non-inversion tillage in organic farming maintains crop yields and increases soil C stocks: a meta-analysis. <i>Agron. Sustain. Dev.</i> 36: 22. <a href="https://doi.org/10.1007/s13593-016-0354-1">https://doi.org/10.1007/s13593-016-0354-1</a>                                           |
| 5  | Gao et al. 2019               | Gao H., Yan C., Liu Q., Li Z., Yang X., Qi R. 2019. Exploring optimal soil mulching to enhance yield and water use efficiency in maize cropping in China: A meta-analysis. <i>Agricultural Water Management</i> 225: 105741. <a href="https://doi.org/10.1016/j.agwat.2019.105741">https://doi.org/10.1016/j.agwat.2019.105741</a>                   |
| 6  | Jian et al. 2020b             | Jian J., Du X., Reiter M.S., Stewart R.D. 2020b. A meta-analysis of global cropland soil carbon changes due to cover cropping. <i>Soil Biology and Biochemistry</i> 143: 107735. <a href="https://doi.org/10.1016/j.soilbio.2020.107735">https://doi.org/10.1016/j.soilbio.2020.107735</a> .                                                         |
| 7  | Jian et al. 2020a             | Jian J., Lester B.J., Du X., Reiter M.S., Stewart R.D. 2020a. A calculator to quantify cover crop effects on soil health and productivity. <i>Soil &amp; Tillage Research</i> 199: 104575. <a href="https://doi.org/10.1016/j.still.2020.104575">https://doi.org/10.1016/j.still.2020.104575</a>                                                     |
| 8  | Keizer and Hessel 2019        | Keizer J.J., Hessel R. 2019. Quantifying the effectiveness of stakeholder-selected measures against individual and combined soil threats. <i>Catena</i> 182: 104148. DOI: 10.1016/j.catena.2019.104148.                                                                                                                                              |
| 9  | Knapp & van der Heiden 2018   | Knapp S., van der Heijden M.G. 2018. A global meta-analysis of yield stability in organic and conservation agriculture. <i>Nature communications</i> 9(1): 1-9.                                                                                                                                                                                      |
| 10 | Li et al. 2018                | Li Q., Li H., Zhang L., Zhang S., Chen Y. 2018. Mulching improves yield and water-use efficiency of potato cropping in China: A meta-analysis. <i>Field Crops Research</i> 221: 50–60. <a href="https://doi.org/10.1016/j.fcr.2018.02.017">https://doi.org/10.1016/j.fcr.2018.02.017</a>                                                             |
| 11 | Lu 2014                       | Lu F. 2014 How can straw incorporation management impact on soil carbon storage? A meta-analysis. <i>Mitig Adapt Strateg Glob Change</i> . DOI 10.1007/s11027-014-9564-5                                                                                                                                                                             |
| 12 | Luo et al. 2010               | Luo Z., Wang E., Sun O.J. 2010. Can no-tillage stimulate carbon sequestration in agricultural soils? A meta-analysis of paired experiments. <i>Agriculture, Ecosystems and Environment</i> 139: 224–231. doi:10.1016/j.agee.2010.08.006                                                                                                              |
| 13 | Marcillo and Miguez 2017      | Marcillo G.S., Miguez F.E. 2017. Corn yield response to winter cover crops: An updated meta-analysis. <i>Journal of Soil and Water Conservation</i> 72: 3. doi: 10.2489/jswc.72.3.226                                                                                                                                                                |
| 14 | Morugán-Coronado et al. 2020  | Morugán-Coronado A., Linares C., Gómez-López M.D., Faz Á., Zornoza R. 2020. The impact of intercropping, tillage and fertilizer type on soil and crop yield in fruit orchards under Mediterranean conditions: A meta-analysis of field studies. <i>Agricultural Systems</i> 178: 102736.                                                             |
| 15 | Nunes et al. 2020             | Nunes M.R., Karlen D.L., Veum K.S., Moorman T.B., Cambardella C.A. 2020. Biological soil health indicators respond to tillage intensity: A US meta-analysis. <i>Geoderma</i> 369: 114335. <a href="https://doi.org/10.1016/j.geoderma.2020.114335">https://doi.org/10.1016/j.geoderma.2020.114335</a>                                                |
| 16 | Pittelkow et al. 2015         | Pittelkow C.M., Linquist B.A., Lundy M.E., Liang X., van Groenigen K.J., Lee J., van Gestel N., Six J., Venterea R.T., van Kessel C. 2015. When does no-till yield more? A global meta-analysis. <i>Field Crops Research</i> 183: 156–168. <a href="http://dx.doi.org/10.1016/j.fcr.2015.07.020">http://dx.doi.org/10.1016/j.fcr.2015.07.020</a>     |

|    |                           |                                                                                                                                                                                                                                                                                          |
|----|---------------------------|------------------------------------------------------------------------------------------------------------------------------------------------------------------------------------------------------------------------------------------------------------------------------------------|
| 17 | Qin et al. 2015           | Qin W., Hu C., Oenema O. 2015. Soil mulching significantly enhances yields and water and nitrogen use efficiencies of maize and wheat: a meta-analysis. Scientific Reports 5: 16210. DOI: 10.1038/srep16210                                                                              |
| 18 | van den Putte et al, 2010 | Van den Putte A., Govers G., Diels J., Gillijns K., Demuzere M. 2010. Assessing the effect of soil tillage on crop growth: A meta-regression analysis on European crop yields under conservation agriculture. European Journal of Agronomy 33(3): 231–241. doi:10.1016/j.eja.2010.05.008 |
