# Supplementary material for: The Effects of Soil Improving Cropping Systems (SICS) on Soil Erosion and Soil Organic Carbon Stocks across Europe: A Simulation Study
Source: MDPI journal article supplement (doi:10.3390/land11060943), 2022-06-19
Supplement: s1 [file s1]

## Supplementary material S2:

### EU scale maps for SOC and erosion used for model evaluation

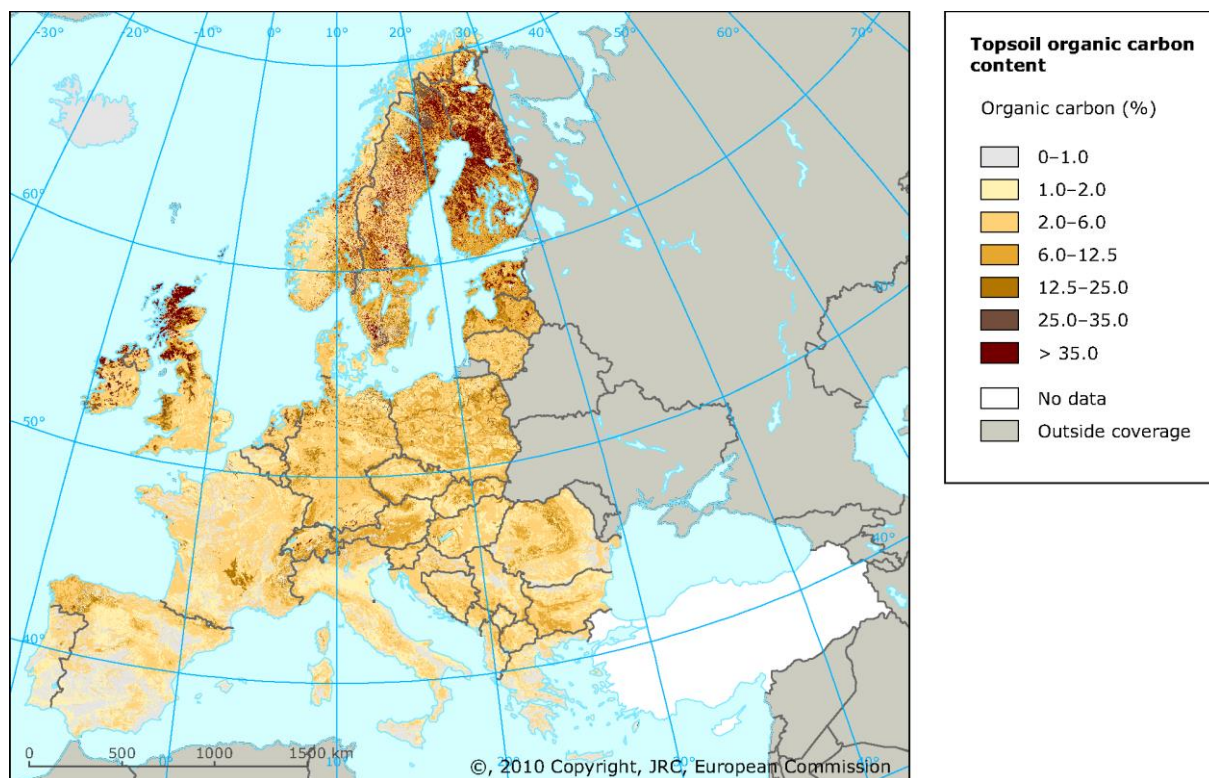

Figure S12: Topsoil organic carbon content (%) - Source: EEA, 2010: <https://www.eea.europa.eu/data-and-maps/figures/variatiions-in-topsoil-organic-carbon>

License: EEA standard re-use policy: unless otherwise indicated, re-use of content on the EEA website for commercial or non-commercial purposes is permitted free of charge, provided that the source is acknowledged (<https://www.eea.europa.eu/legal/copyright>). Copyright holder: European Commission.

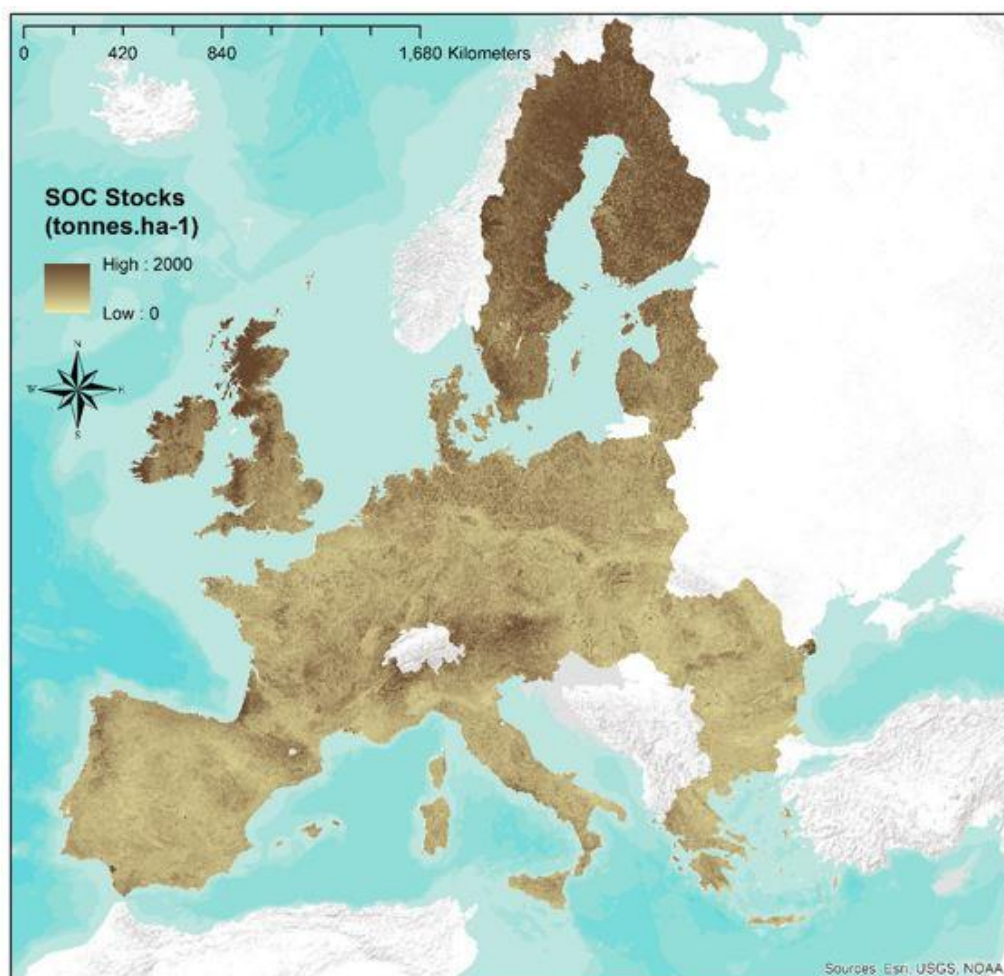

Figure S13: SOC Stocks (ton/ha) - Source: Yigini and Panagos (2016).

Reference:

Yigini, Y.; Panagos, P. Assessment of soil organic carbon stocks under future climate and land cover changes in Europe. *Sci. Total Environ.* **2016**, 557–558, 838–850.  
<https://doi.org/10.1016/j.scitotenv.2016.03.085>

License: <https://creativecommons.org/licenses/by/4.0/>

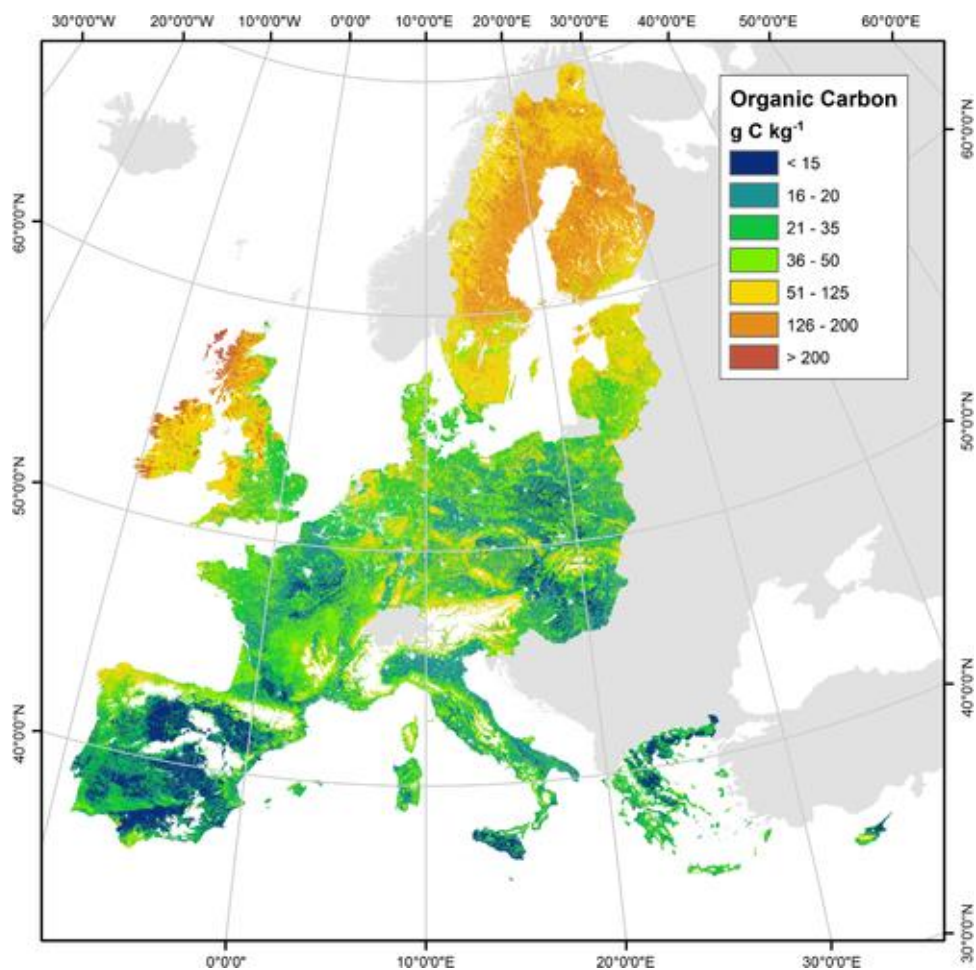

Figure S14: Organic Carbon (g/kg) - Source: De Brogniez et al., 2015

Reference:

de Brogniez, D.; Ballabio, C.; Stevens, A.; Jones, R.J.A.; Montanarella, L.; van Wesemael, B. A map of the topsoil organic carbon content of Europe generated by a generalized additive model. *Eur. J. Soil Sci.* **2015**, 66, 121–134. <https://doi.org/10.1111/ejss.12193>

License: <https://creativecommons.org/licenses/by-nc/3.0/>

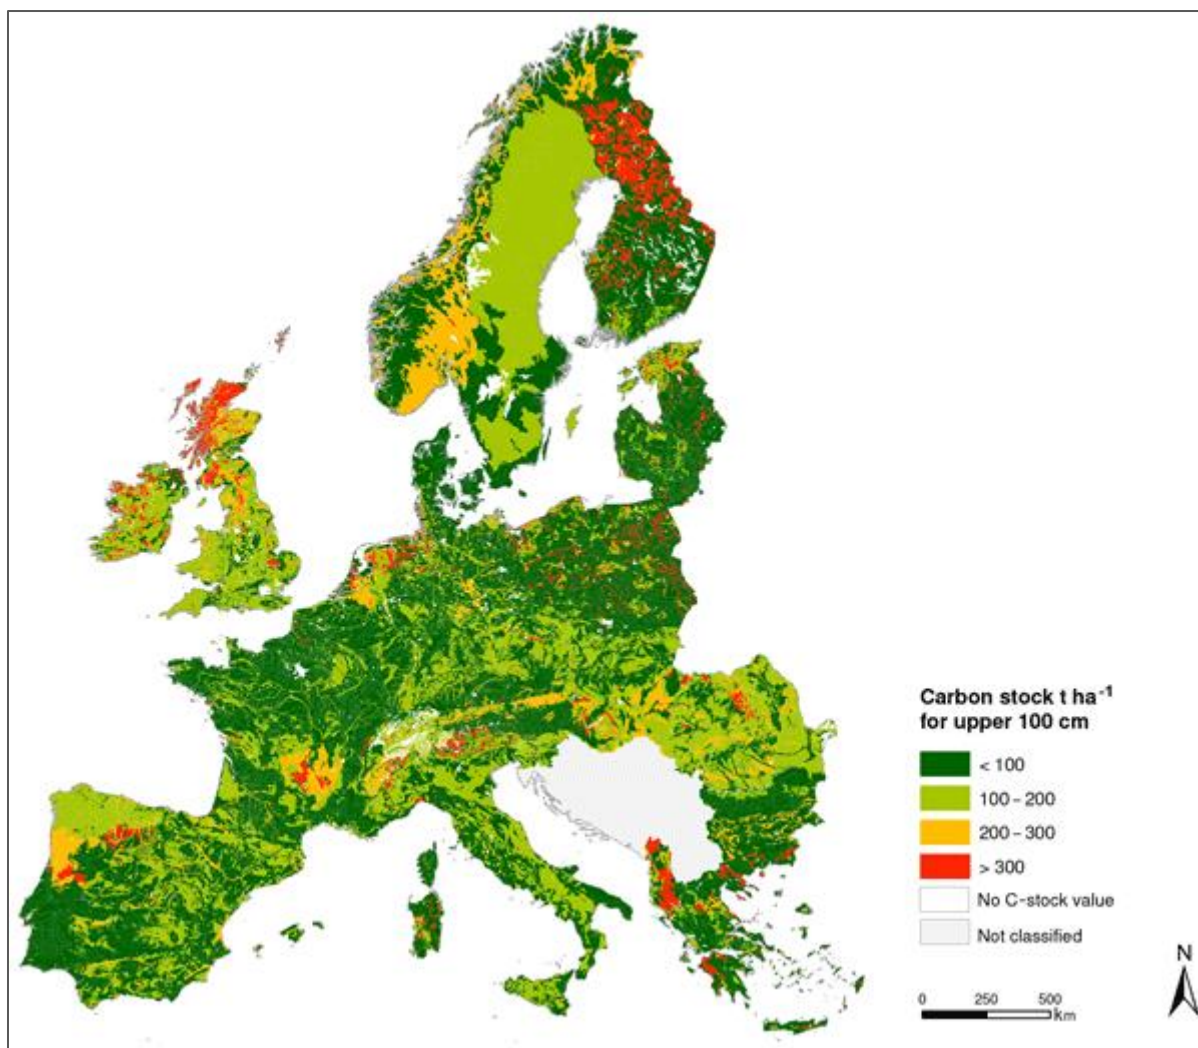

Figure S15: Carbon stock ( $\text{t/ha}$ ) estimate based on the soil profile database for Europe (SPADE) – Source: Aagaard Kristensen et al., 2019.

Reference:

Aagaard Kristensen, J.; Balstrøm, T.; Jones, R.J.A.; Jones, A.; Montanarella, L.; Panagos, P.; Breuning-Madsen, H. Development of a harmonised soil profile analytical database for Europe: a resource for supporting regional soil management. *SOIL* **2019**, 5, 289–301. 10.5194/soil-5-289-2019.

License: <https://creativecommons.org/licenses/by/4.0/>



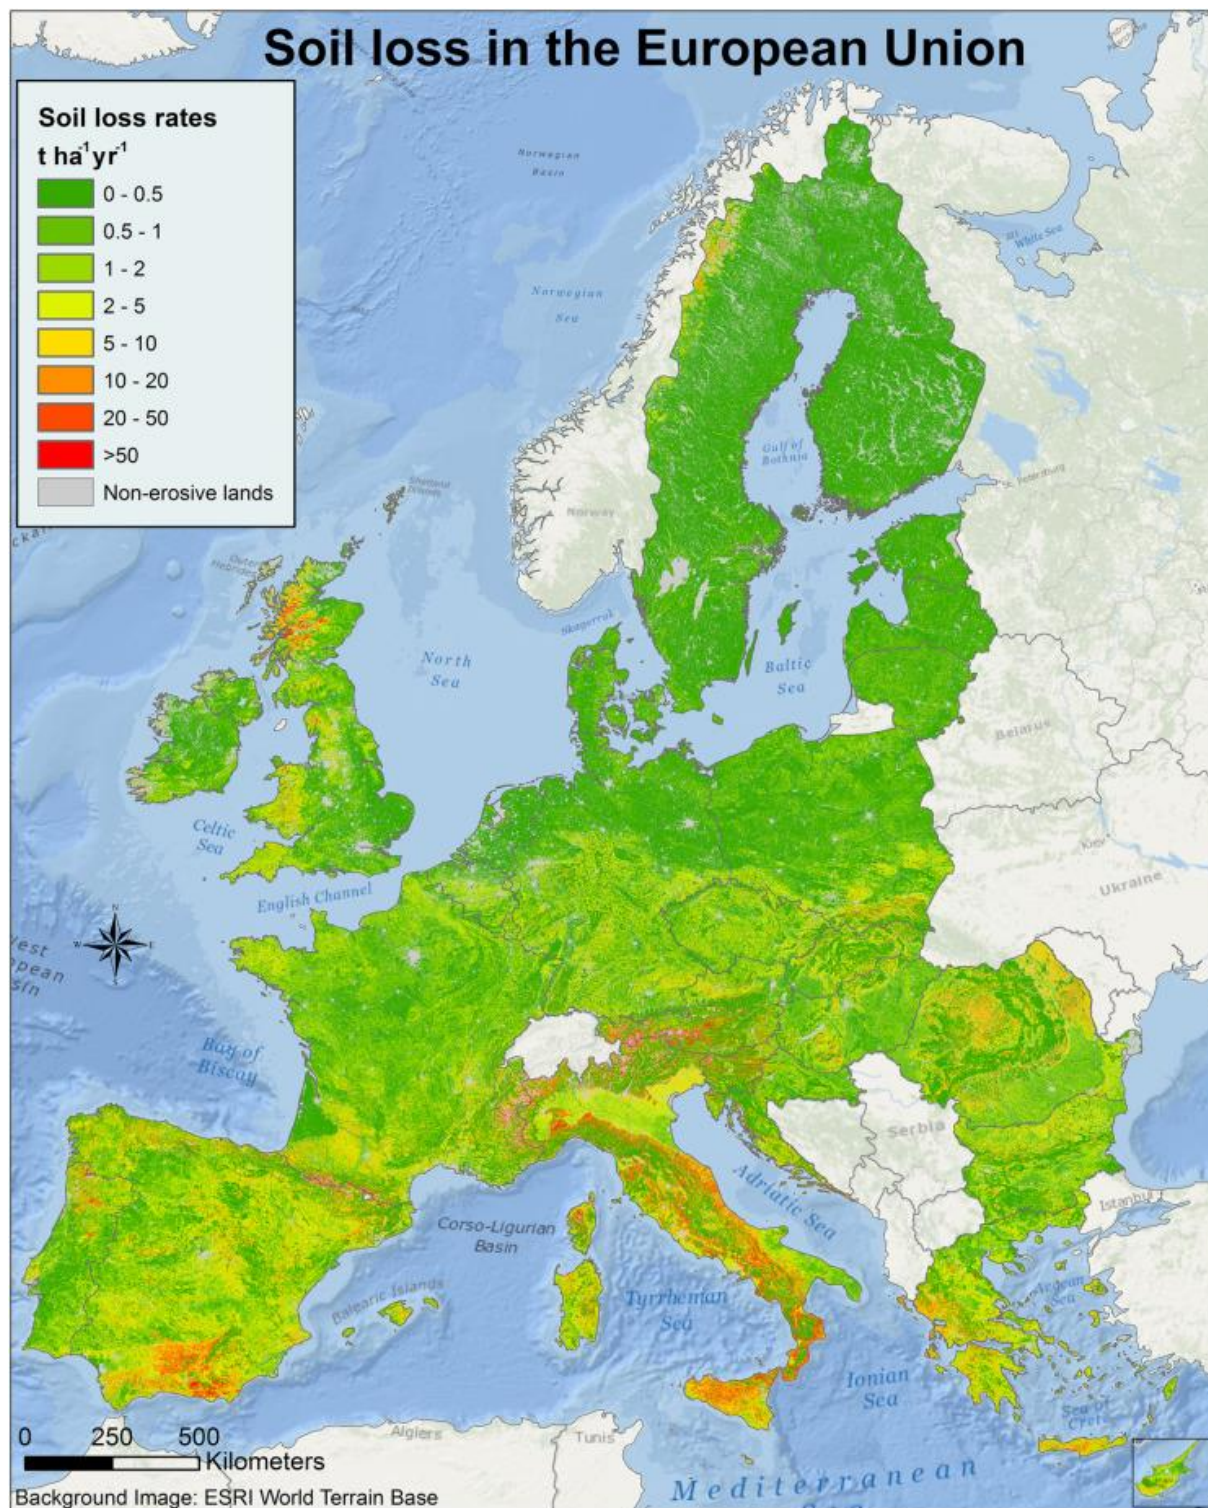

Figure S16: Soil loss across the EU as simulated with the RUSLE equation. - Source: Panagos et al. (2015)

Reference:

Panagos, P.; Borrelli, P.; Poesen, J.; Ballabio, C.; Lugato, E.; Meusburger, K.; Montanarella, L.; Alewell, C. The new assessment of soil loss by water erosion in Europe. *Environ. Sci. Policy* **2015**, *54*, 438–447. <https://doi.org/10.1016/j.envsci.2015.08.012>.

License: <https://creativecommons.org/licenses/by/4.0/>

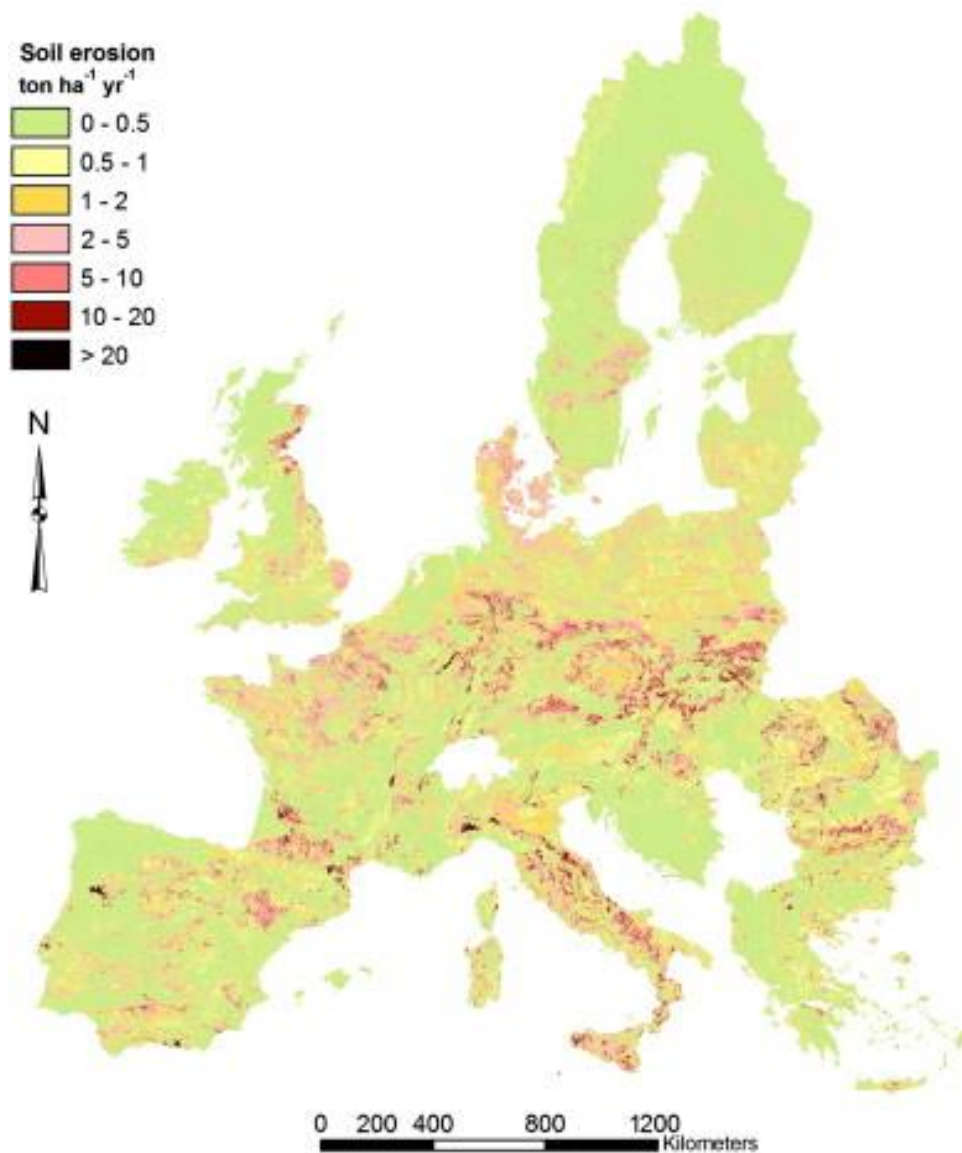

Figure S17: Estimated sheet and rill erosion rates (t/ha/y) calculated for the areas of Europe covered by the CORINE database. Source: Cerdan et al., 2010

**Reference:**

Cerdan, O.; Govers, G.; Le Bissonnais, Y.; Van Oost, K.; Poesen, J.; Saby, N.; Gobin, A.; Vacca, A.; Quinton, J.; Auerswald, K.; et al. Rates and spatial variations of soil erosion in Europe: A study based on erosion plot data. *Geomorphology* **2010**, *122*, 167–177.  
<https://doi.org/10.1016/j.geomorph.2010.06.011>.

License: Confirmed by Elsevier; License number 5297720875275.



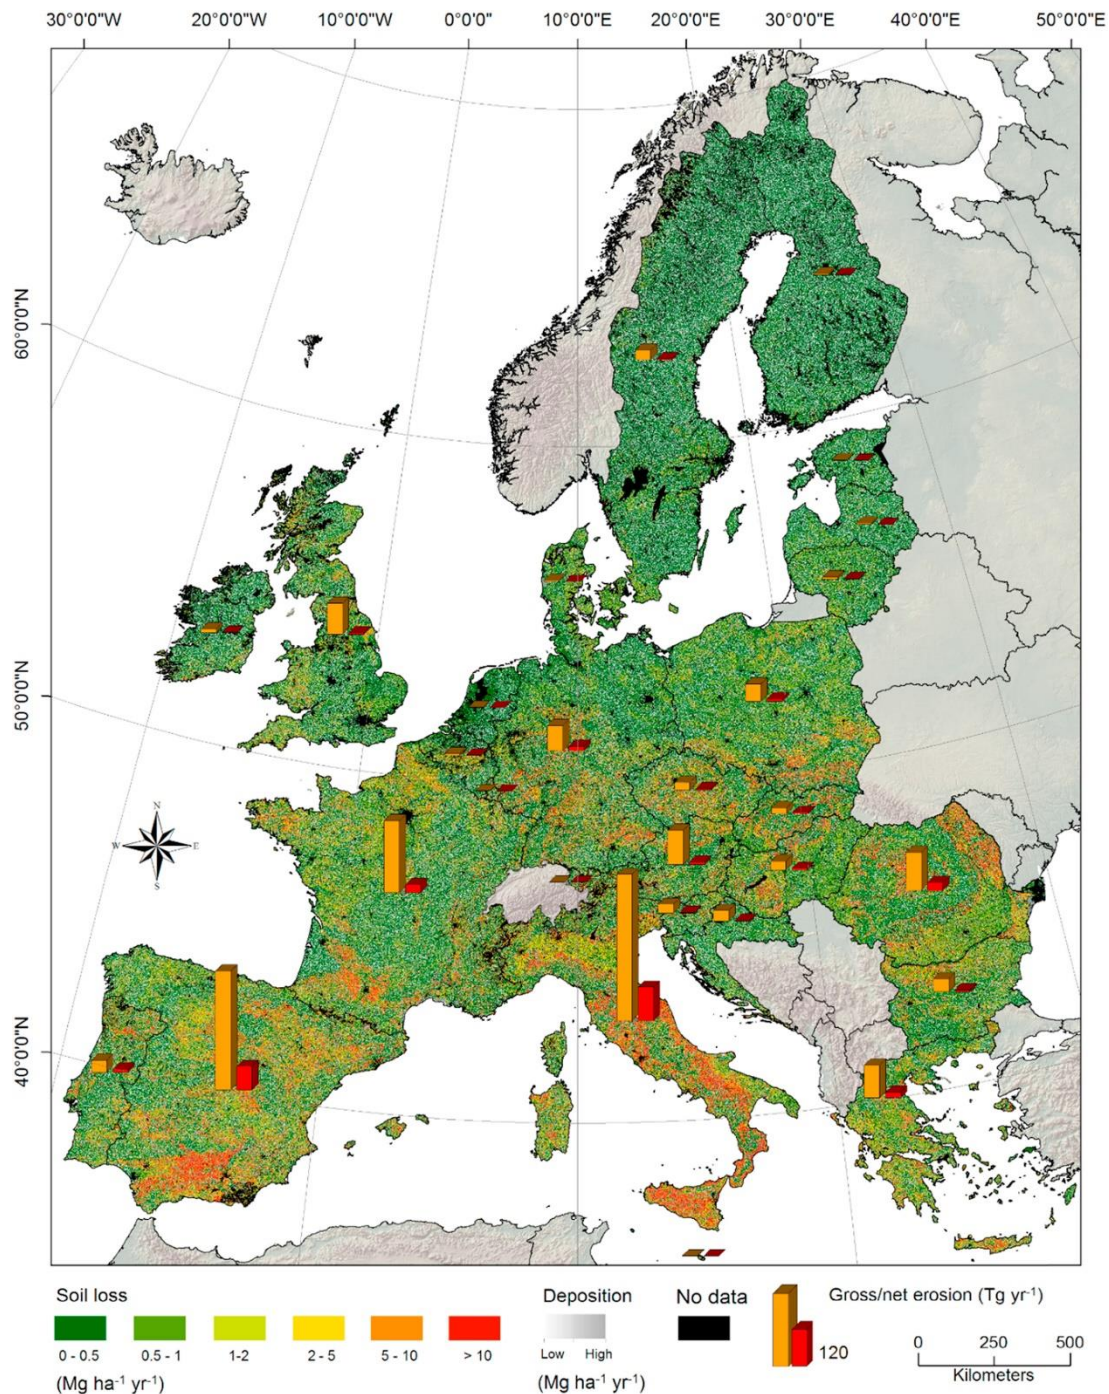

Figure S18: Estimated average annual soil loss and deposition rate for the European Union based on WaTEM/SEDEM. The vertical bars show the annual gross (orange) and net (red) soil losses in each country. Source: Borelli et al., 2018

Reference: Borrelli, P.; Van Oost, K.; Meusburger, K.; Alewell, C.; Lugato, E.; Panagos, P. A step towards a holistic assessment of soil degradation in Europe: Coupling on-site erosion with sediment transfer and carbon fluxes. *Environ. Res.* **2018**, *161*, 291–298.  
<https://doi.org/10.1016/j.envres.2017.11.009>.

License: <https://creativecommons.org/licenses/by/4.0/>

# **SOC calibration data per land use / crop type and climate zone**

Aggregated from the LUCAS database: <https://esdac.jrc.ec.europa.eu/projects/lucas>

Table S6: SOC content (g kg<sup>-1</sup>) per land use and crop type for the four climate zones. N = number of data points in the class.

| Land use / crop type    | Dominant climate  |          |      |               |          |      |         |          |      |          |          |      |
|-------------------------|-------------------|----------|------|---------------|----------|------|---------|----------|------|----------|----------|------|
|                         | Humid continental |          |      | Mediterranean |          |      | Oceanic |          |      | Subartic |          |      |
|                         | Mean              | St. dev. | n    | Mean          | St. dev. | n    | Mean    | St. dev. | n    | Mean     | St. dev. | n    |
| Broadleaved forest      | 48.1              | 66.9     | 788  | 39.8          | 36.8     | 876  | 62.3    | 67.8     | 377  | 122.6    | 153.0    | 239  |
| Coniferous forest       | 63.1              | 79.7     | 647  | 48.3          | 48.9     | 474  | 95.9    | 100.0    | 157  | 118.0    | 154.0    | 1227 |
| Mixed forest            | 73.0              | 96.1     | 514  | 54.1          | 62.2     | 150  | 77.5    | 71.7     | 155  | 123.8    | 158.1    | 977  |
| Shrubland               | 45.4              | 46.2     | 96   | 35.6          | 33.9     | 568  | 98.8    | 124.0    | 107  | 85.3     | 132.8    | 75   |
| Grassland               | 37.0              | 53.8     | 2026 | 26.1          | 25.0     | 1196 | 53.4    | 57.7     | 1369 | 69.1     | 89.1     | 160  |
| Artificial land         | 30.2              | 16.5     | 17   | 18.4          | 18.3     | 19   | 29.5    | 18.9     | 8    | 81.3     | 108.6    | 6    |
| Bareland                | 23.8              | 54.3     | 101  | 13.0          | 11.7     | 408  | 19.3    | 15.1     | 71   | 48.9     | 61.9     | 24   |
| Forage                  | 14.5              | 8.0      | 421  | 13.7          | 10.0     | 213  | 22.3    | 13.2     | 83   | 31.3     | 34.7     | 29   |
| Fruit trees and berries | 20.7              | 11.2     | 77   | 17.8          | 14.0     | 234  | 32.3    | 22.2     | 15   |          |          |      |
| Maize                   | 16.9              | 13.5     | 652  | 18.4          | 15.5     | 196  | 16.7    | 7.8      | 348  | 12.6     |          | 1    |
| Oilseed                 | 18.4              | 18.9     | 274  | 7.6           | 2.9      | 14   | 18.3    | 9.3      | 217  | 22.4     | 9.5      | 14   |
| Olive groves            | 21.4              |          | 1    | 16.7          | 11.8     | 470  | 14.3    | 4.9      | 4    |          |          |      |
| Pulses                  | 19.8              | 31.7     | 87   | 15.8          | 11.0     | 111  | 16.5    | 7.0      | 52   | 43.3     | 50.8     | 4    |
| Rice                    |                   |          |      | 15.9          | 6.5      | 12   |         |          |      |          |          |      |
| Root crop - Potato      | 15.8              | 10.0     | 127  | 14.3          | 19.7     | 40   | 16.8    | 14.2     | 132  | 16.1     | 7.6      | 13   |
| Veg & Flowers           | 17.8              | 9.4      | 180  | 10.7          | 5.8      | 199  | 14.7    | 8.0      | 104  | 13.1     |          | 1    |
| Vineyards               | 17.1              | 6.1      | 39   | 12.6          | 12.9     | 224  | 14.9    | 7.4      | 63   |          |          |      |
| Winter/Spring cereal    | 17.8              | 15.5     | 1503 | 13.1          | 9.7      | 1306 | 18.2    | 11.1     | 914  | 37.7     | 42.6     | 185  |
